# Supplementary material for: Coupling between two Ru(bda) catalysts bridged by a trans-dicyano complex
Source: Royal Society of Chemistry journal article supplement (doi:10.1039/d3dt03220e), 2023-12-11
Supplement: d3dt03220e1.pdf [file d3dt03220e1.pdf]

ELECTRONIC SUPPLEMENTARY INFORMATION

for

Coupling Between two Ru(bda) Catalysts Bridged by a *trans*-dicyano  
Complex

Pedro O. Abate,<sup>a,b</sup> Virginia M. Juárez,<sup>a,b</sup> and Luis M. Baraldo<sup>a,b</sup>

<sup>a</sup> Universidad de Buenos Aires, Facultad de Ciencias Exactas y Naturales, Departamento de Química Inorgánica, Analítica y Química Física, Pabellón 2, Ciudad Universitaria, C1428EHA, Buenos Aires, Argentina.

<sup>b</sup> CONICET – Universidad de Buenos Aires. Instituto de Química Física de Materiales, Medio Ambiente y Energía (INQUIMAE), Pabellón 2, Ciudad Universitaria, C1428EHA, Buenos Aires, Argentina.

## Table of contents

|                         |           |                         |           |
|-------------------------|-----------|-------------------------|-----------|
| <i>Figure S1</i> .....  | <b>3</b>  | <i>Table S12</i> .....  | <b>28</b> |
| <i>Figure S2</i> .....  | <b>3</b>  | <i>Figure S31</i> ..... | <b>28</b> |
| <i>Figure S3</i> .....  | <b>4</b>  | <i>Table S13</i> .....  | <b>29</b> |
| <i>Figure S4</i> .....  | <b>5</b>  | <i>Figure S32</i> ..... | <b>29</b> |
| <i>Figure S5</i> .....  | <b>6</b>  | <i>Figure S33</i> ..... | <b>30</b> |
| <i>Figure S6</i> .....  | <b>7</b>  | <i>Table S13</i> .....  | <b>29</b> |
| <i>Figure S7</i> .....  | <b>8</b>  | <i>Table S14</i> .....  | <b>31</b> |
| <i>Figure S8</i> .....  | <b>9</b>  | <i>Figure S34</i> ..... | <b>32</b> |
| <i>Figure S9</i> .....  | <b>10</b> | <i>Table S15</i> .....  | <b>32</b> |
| <i>Figure S10</i> ..... | <b>11</b> | <i>Figure S35</i> ..... | <b>33</b> |
| <i>Figure S11</i> ..... | <b>11</b> | <i>Figure S36</i> ..... | <b>33</b> |
| <i>Figure S12</i> ..... | <b>12</b> | <i>Table S16</i> .....  | <b>34</b> |
| <i>Figure S13</i> ..... | <b>13</b> | <i>Figure S37</i> ..... | <b>34</b> |
| <i>Figure S14</i> ..... | <b>14</b> |                         |           |
| <i>Figure S15</i> ..... | <b>14</b> |                         |           |
| <i>Figure S16</i> ..... | <b>15</b> |                         |           |
| <i>Figure S17</i> ..... | <b>15</b> |                         |           |
| <i>Figure S18</i> ..... | <b>15</b> |                         |           |
| <i>Figure S19</i> ..... | <b>16</b> |                         |           |
| <i>Figure S20</i> ..... | <b>16</b> |                         |           |
| <i>Figure S21</i> ..... | <b>16</b> |                         |           |
| <i>Table S1</i> .....   | <b>17</b> |                         |           |
| <i>Figure S22</i> ..... | <b>17</b> |                         |           |
| <i>Table S2</i> .....   | <b>18</b> |                         |           |
| <i>Figure S23</i> ..... | <b>19</b> |                         |           |
| <i>Table S3</i> .....   | <b>19</b> |                         |           |
| <i>Table S4</i> .....   | <b>20</b> |                         |           |
| <i>Figure S24</i> ..... | <b>20</b> |                         |           |
| <i>Table S5</i> .....   | <b>21</b> |                         |           |
| <i>Figure S25</i> ..... | <b>21</b> |                         |           |
| <i>Table S6</i> .....   | <b>22</b> |                         |           |
| <i>Table S7</i> .....   | <b>23</b> |                         |           |
| <i>Figure S26</i> ..... | <b>23</b> |                         |           |
| <i>Table S8</i> .....   | <b>24</b> |                         |           |
| <i>Figure S27</i> ..... | <b>24</b> |                         |           |
| <i>Table S9</i> .....   | <b>25</b> |                         |           |
| <i>Figure S28</i> ..... | <b>25</b> |                         |           |
| <i>Table S10</i> .....  | <b>26</b> |                         |           |
| <i>Figure S29</i> ..... | <b>26</b> |                         |           |
| <i>Table S11</i> .....  | <b>27</b> |                         |           |
| <i>Figure S30</i> ..... | <b>27</b> |                         |           |

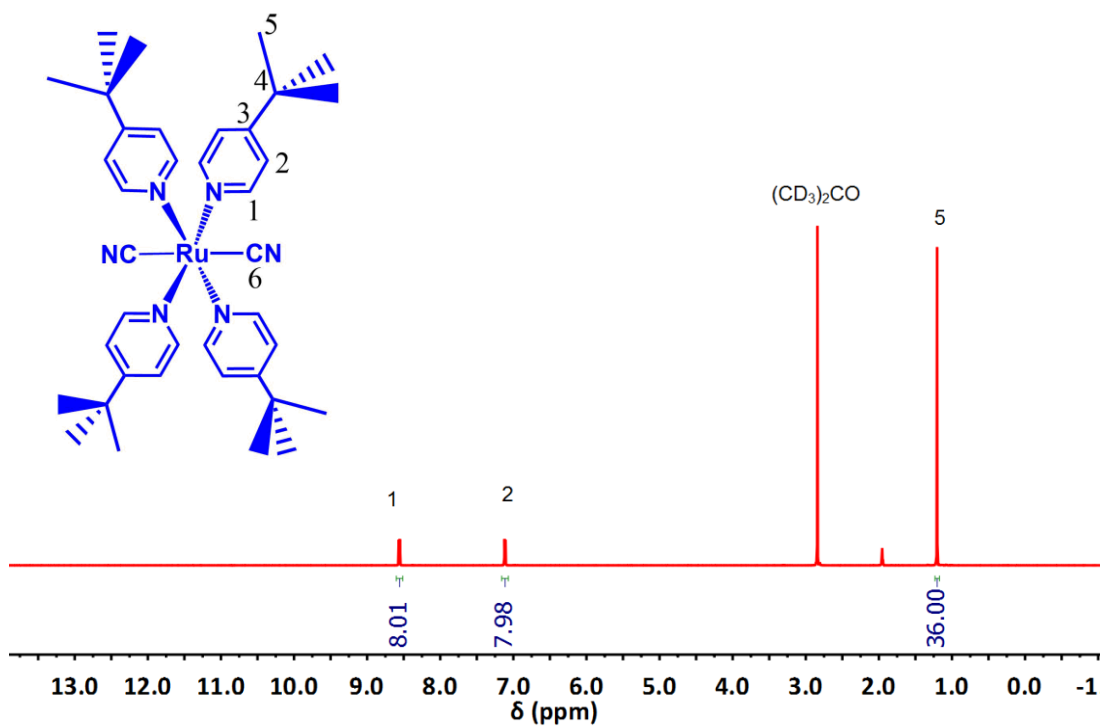

Fig. S1 500 MHz  $^1\text{H-NMR}$  spectrum of  $trans\text{-Ru}(\text{tbupy})_4(\text{CN})_2$  dissolved in  $(\text{CD}_3)_2\text{CO}$ .

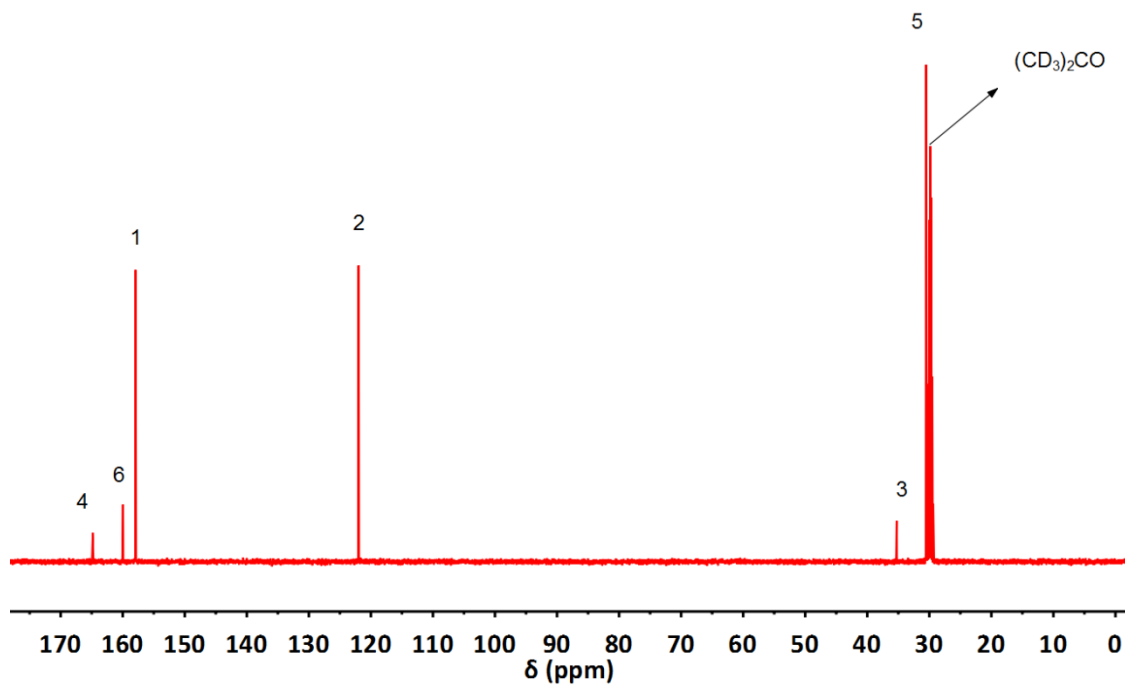

Fig. S2 125 MHz  $^{13}\text{C-NMR}$  spectrum of  $trans\text{-Ru}(\text{tbupy})_4(\text{CN})_2$  dissolved in  $(\text{CD}_3)_2\text{CO}$ .

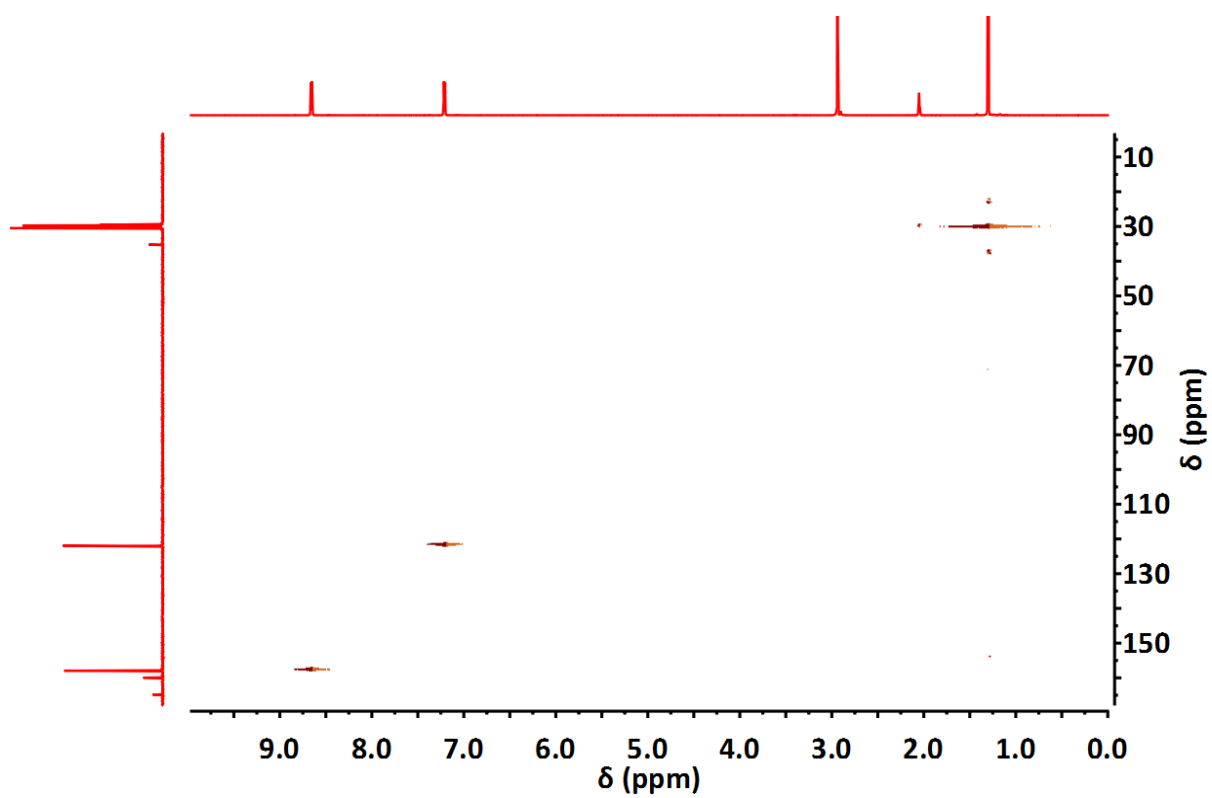

**Fig. S3** 2D  $^1\text{H}$ - $^{13}\text{C}$  HSQC spectrum of *trans*- $\text{Ru}(\text{tbupy})_4(\text{CN})_2$  dissolved in  $(\text{CD}_3)_2\text{CO}$ .

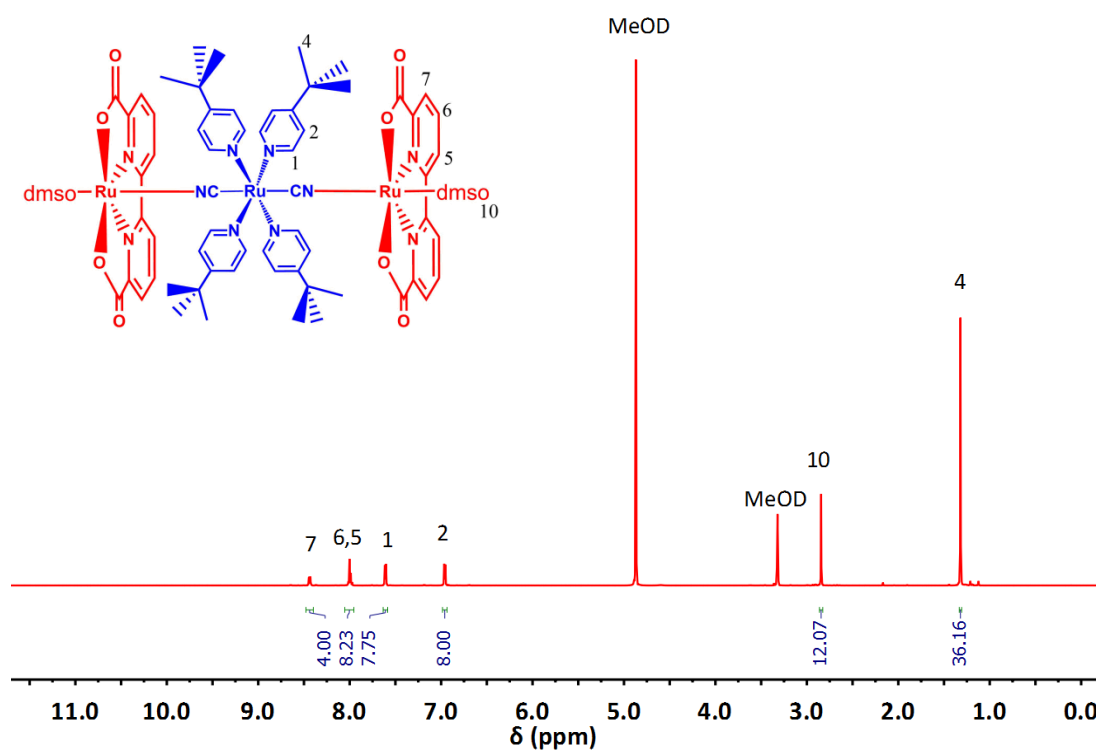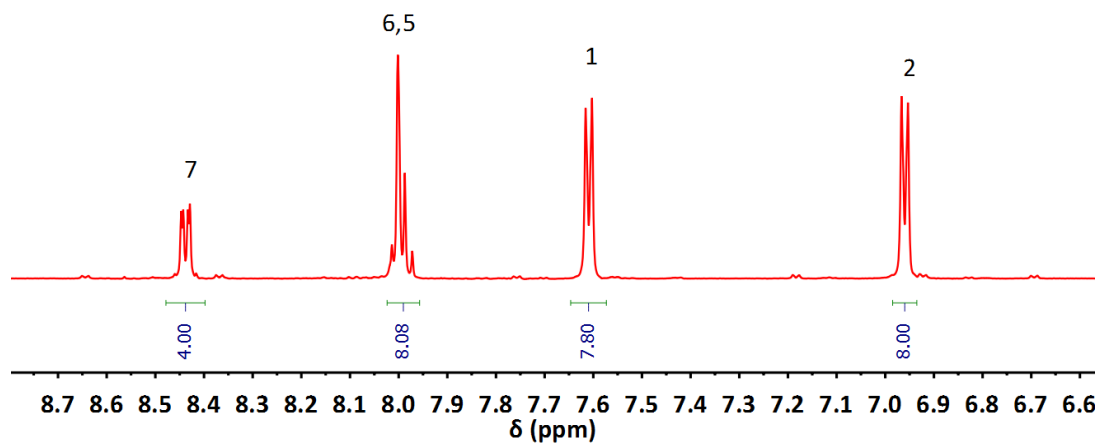

**Fig. S4** 500 MHz  $^1\text{H}$ -NMR spectrum of  $[\text{RuRu}(\text{tbupy})_4\text{Ru}]$  dissolved in  $\text{CD}_3\text{OD}$ .

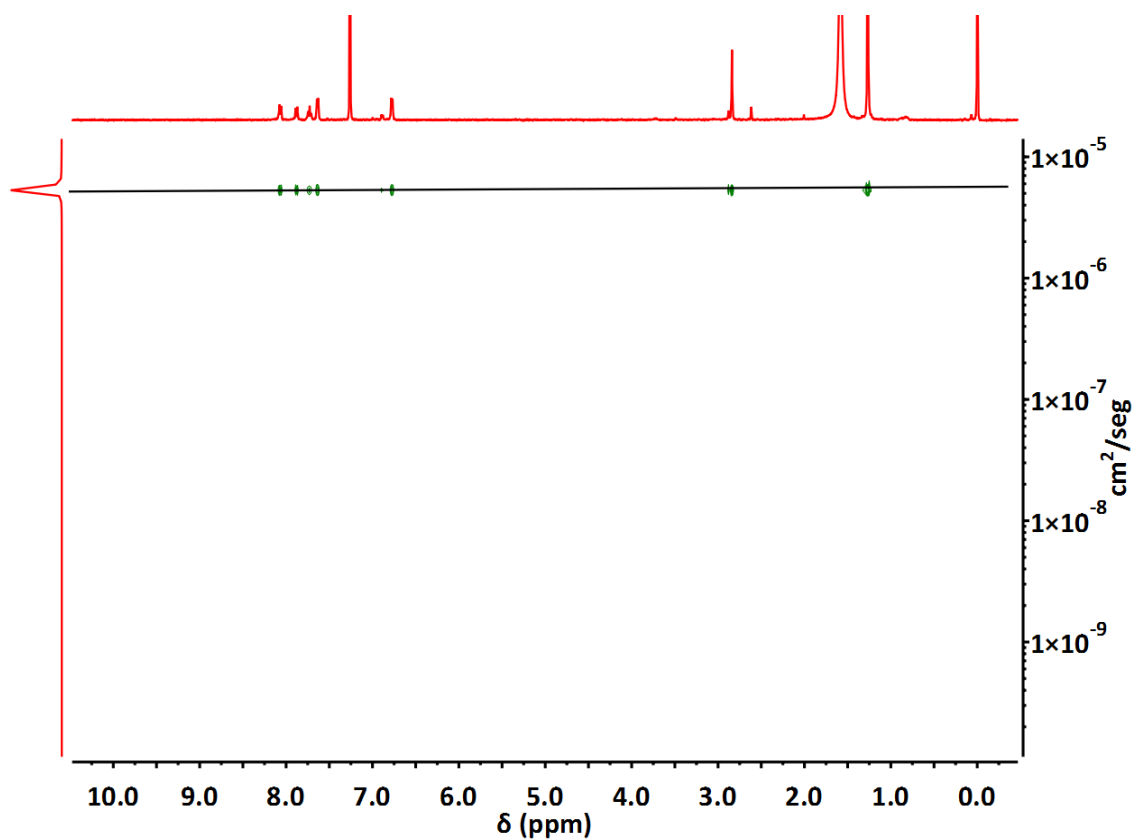

**Fig. S5** <sup>1</sup>H-DOSY spectrum of **[RuRu(tbupy)<sub>4</sub>Ru]** in CDCl<sub>3</sub> at 298K. The diffusion coefficient is  $5.31 \times 10^{-6} \text{ cm}^2/\text{s}$ .

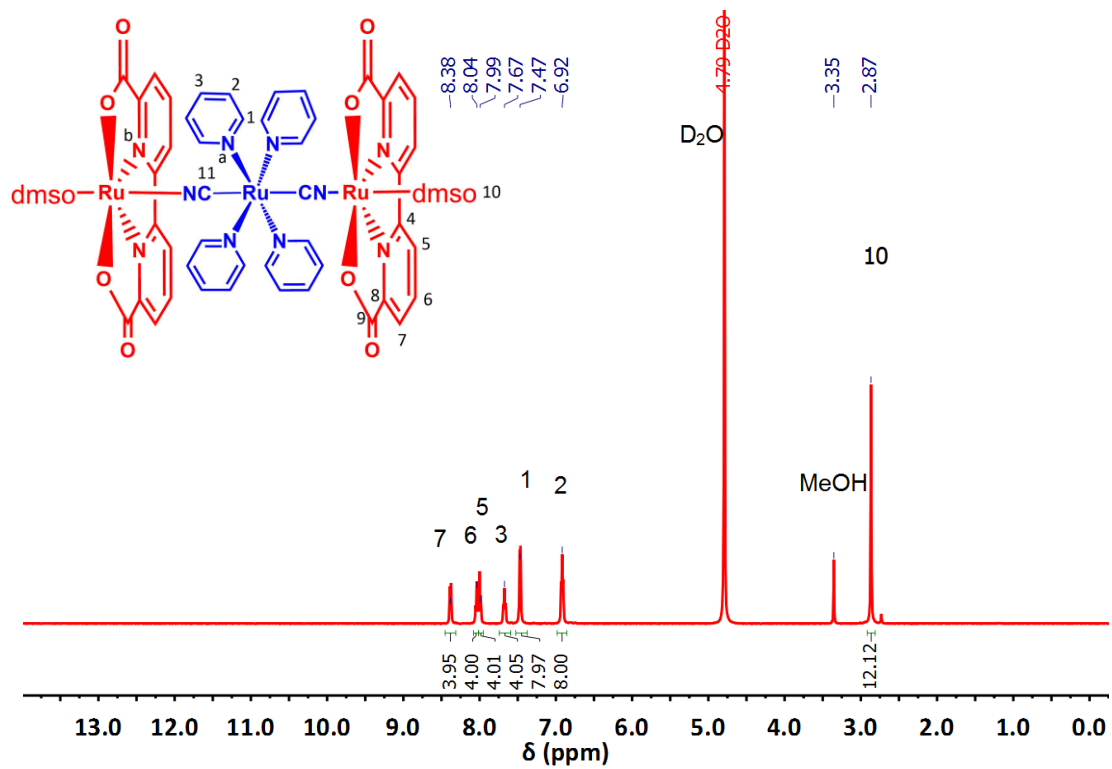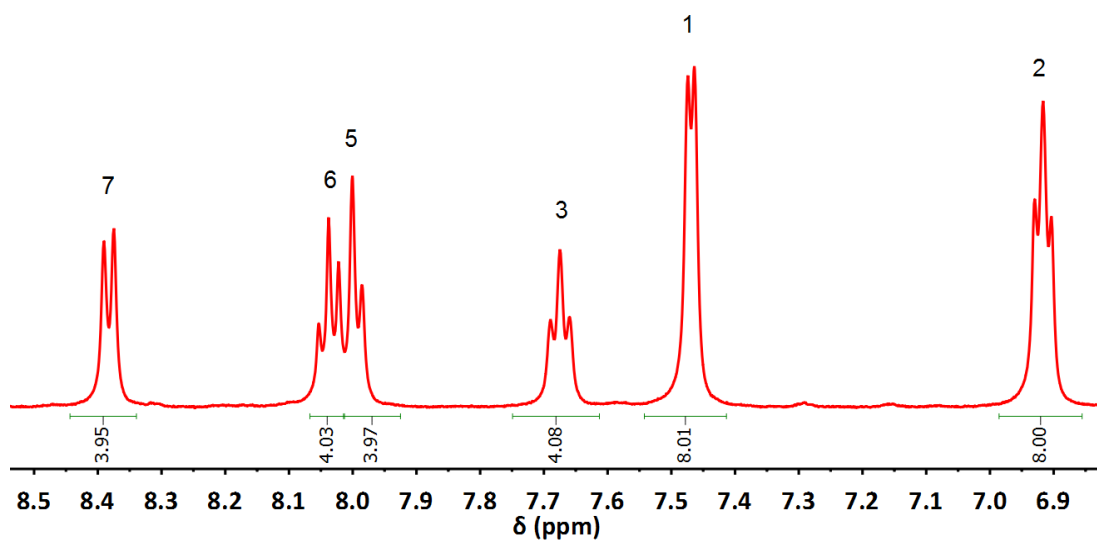

Fig. S6 500 MHz  $^1\text{H-NMR}$  spectrum of  $[\text{RuRu}(\text{py})_4\text{Ru}]$  dissolved in  $\text{D}_2\text{O}$ .

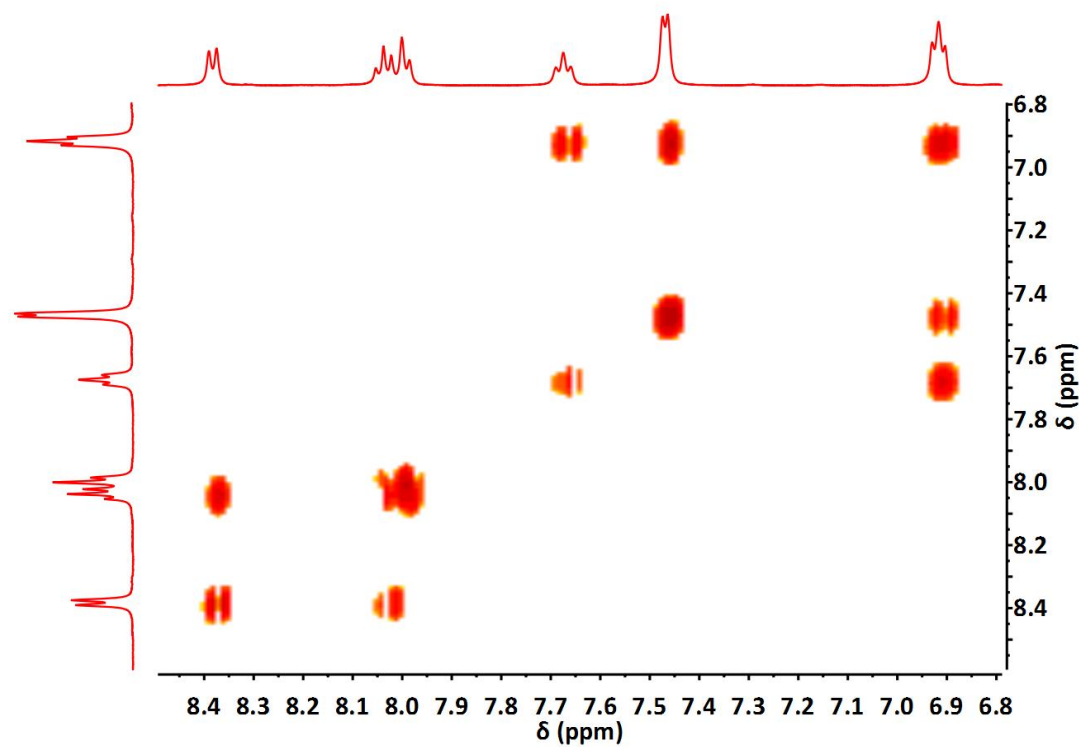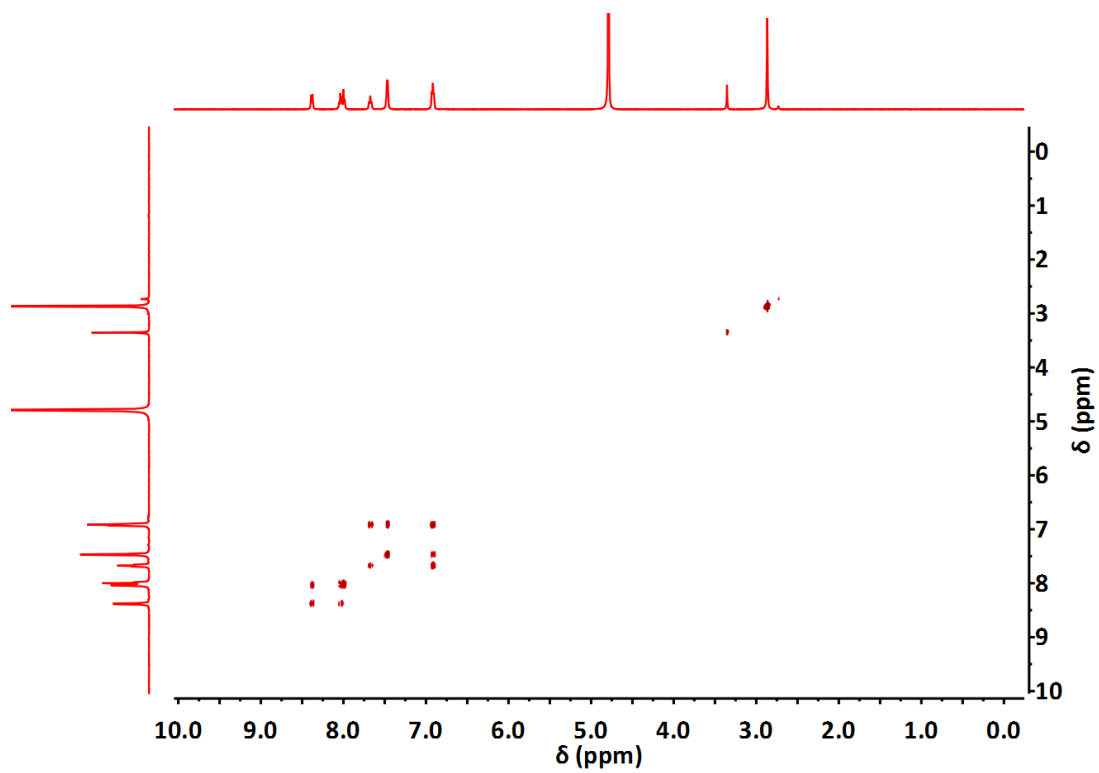

**Fig. S7** 2D  $^1\text{H}$ - $^1\text{H}$  COSY spectrum of  $[\text{RuRu}(\text{py})_4\text{Ru}]$  dissolved in  $\text{D}_2\text{O}$ .



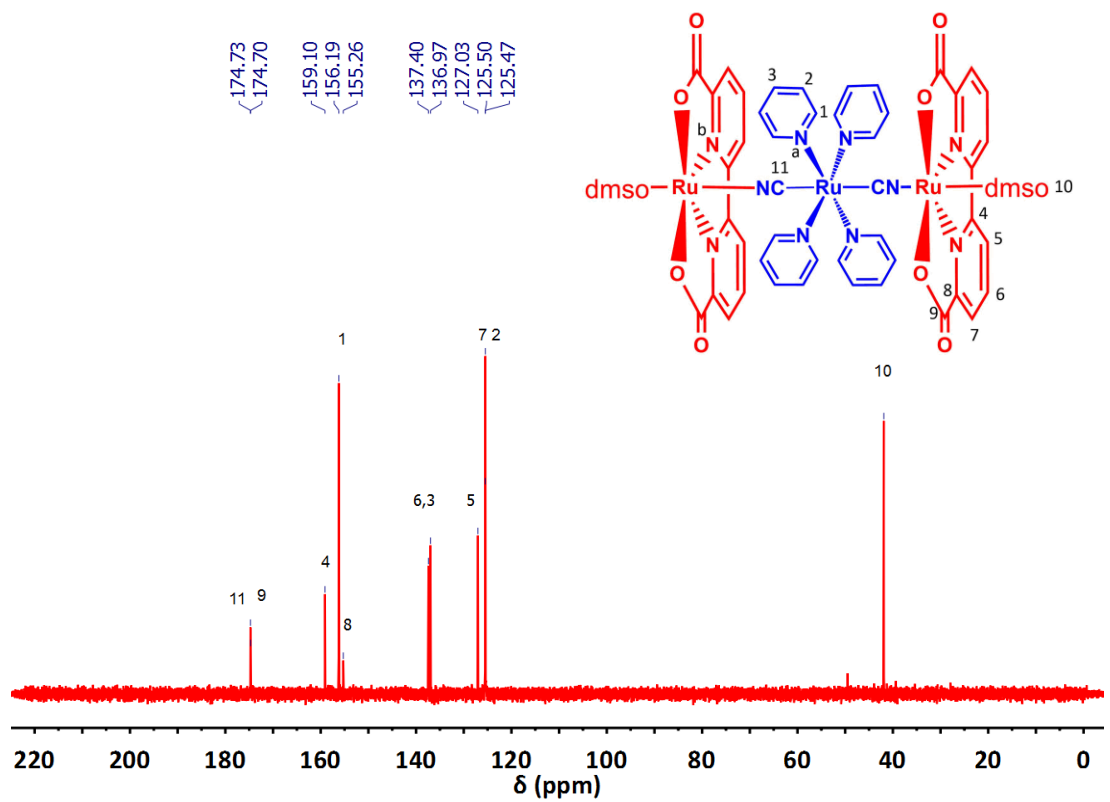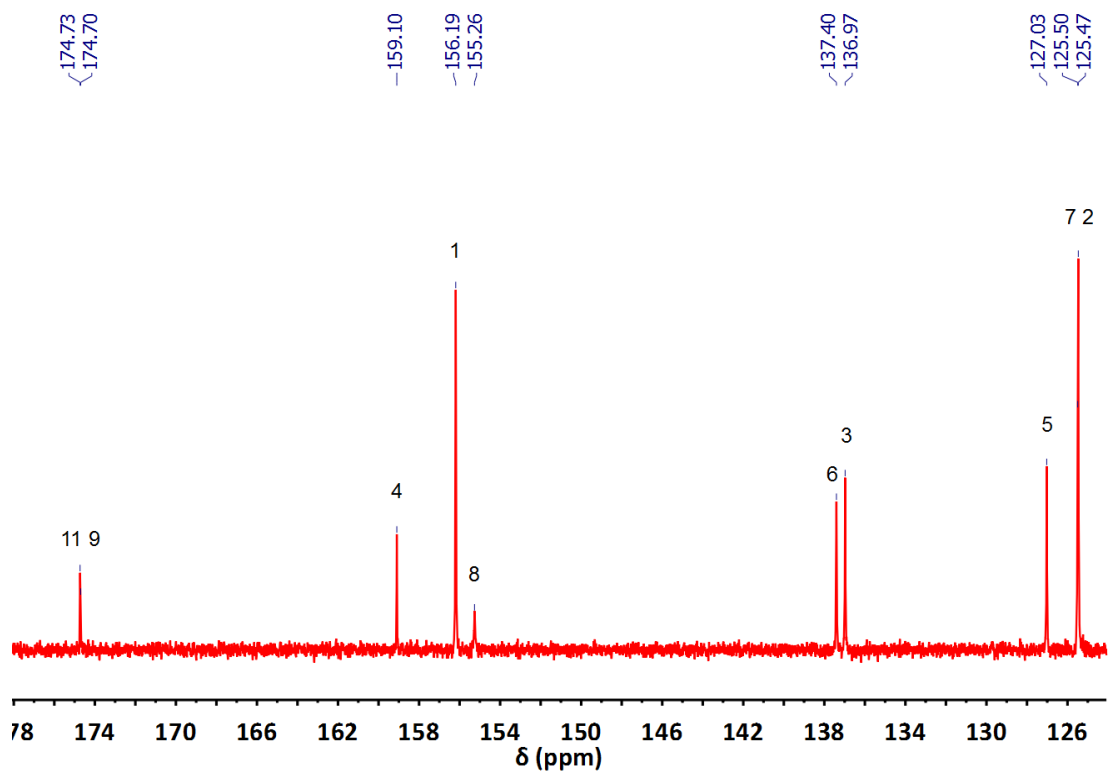

Fig. S8 125 MHz  $^{13}\text{C}$ -NMR spectrum of  $[\text{RuRu}(\text{py})_4\text{Ru}]$  dissolved in  $\text{D}_2\text{O}$ .

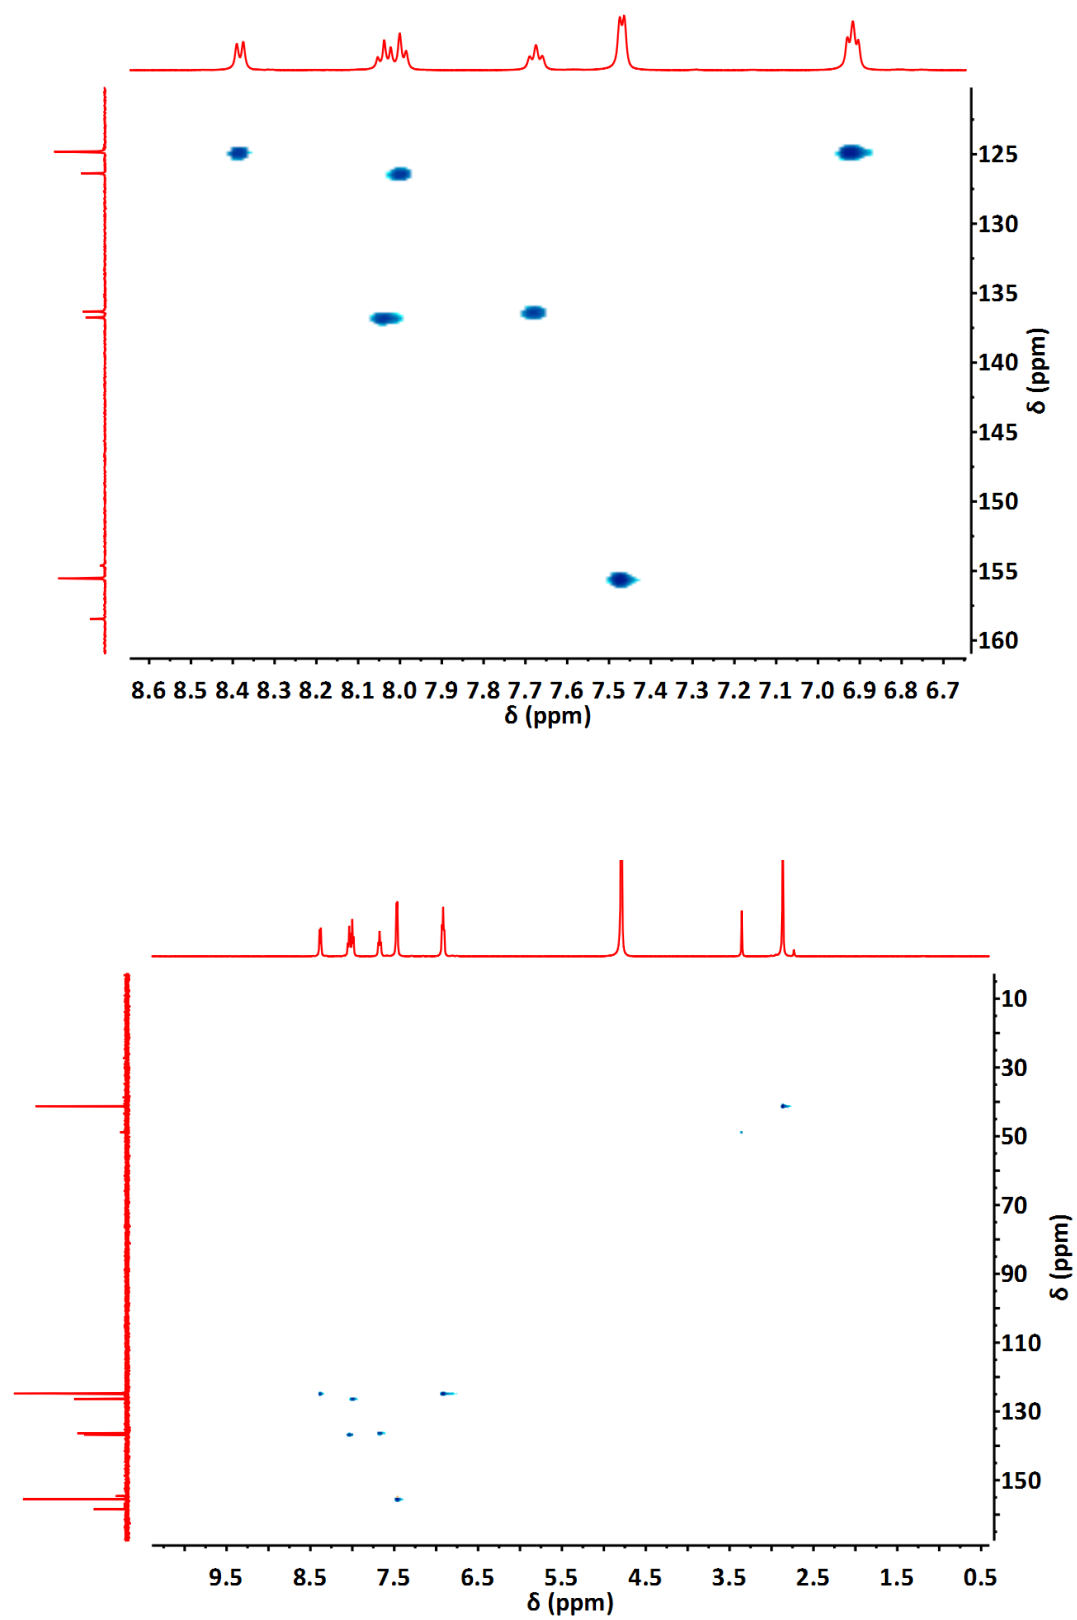

Fig. S9 2D  $^1\text{H}$ - $^{13}\text{C}$  HSQC spectrum of  $[\text{RuRu}(\text{py})_4\text{Ru}]$  dissolved in  $\text{D}_2\text{O}$ .

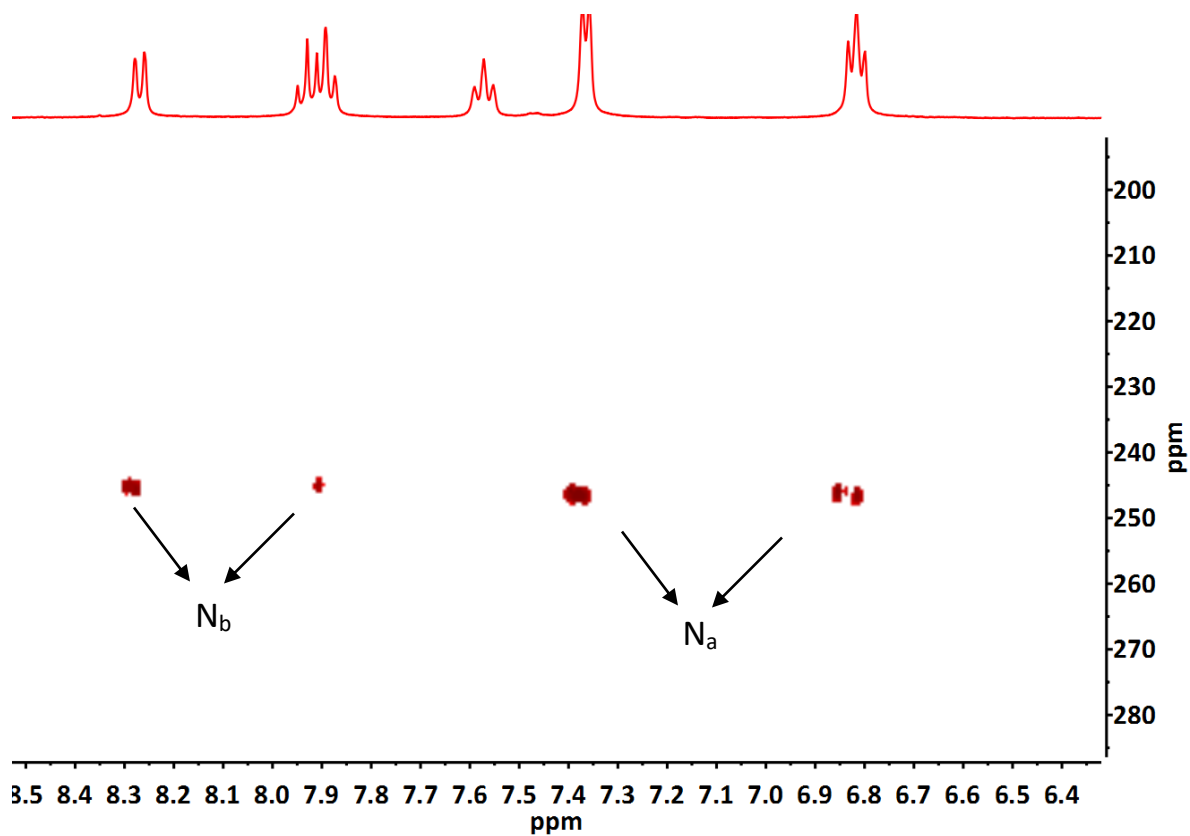

**Fig. S10** 2D  $^1\text{H}$ - $^{15}\text{N}$  HSQC spectrum of  $[\text{RuRu}(\text{py})_4\text{Ru}]$  dissolved in  $\text{D}_2\text{O}$ .

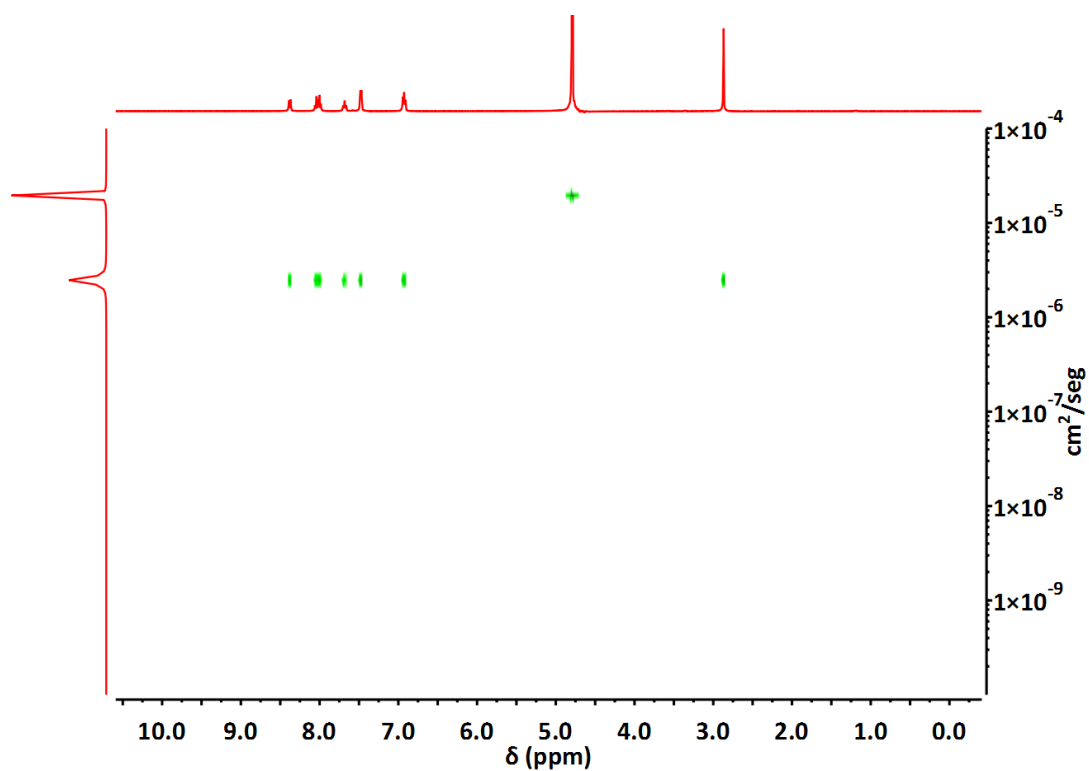

**Fig. S11**  $^1\text{H}$ -DOSY spectrum of  $[\text{RuRu}(\text{py})_4\text{Ru}]$  in  $\text{D}_2\text{O}$  at 298K. The diffusion coefficient is  $2.48 \times 10^{-6} \text{ cm}^2/\text{s}$ .

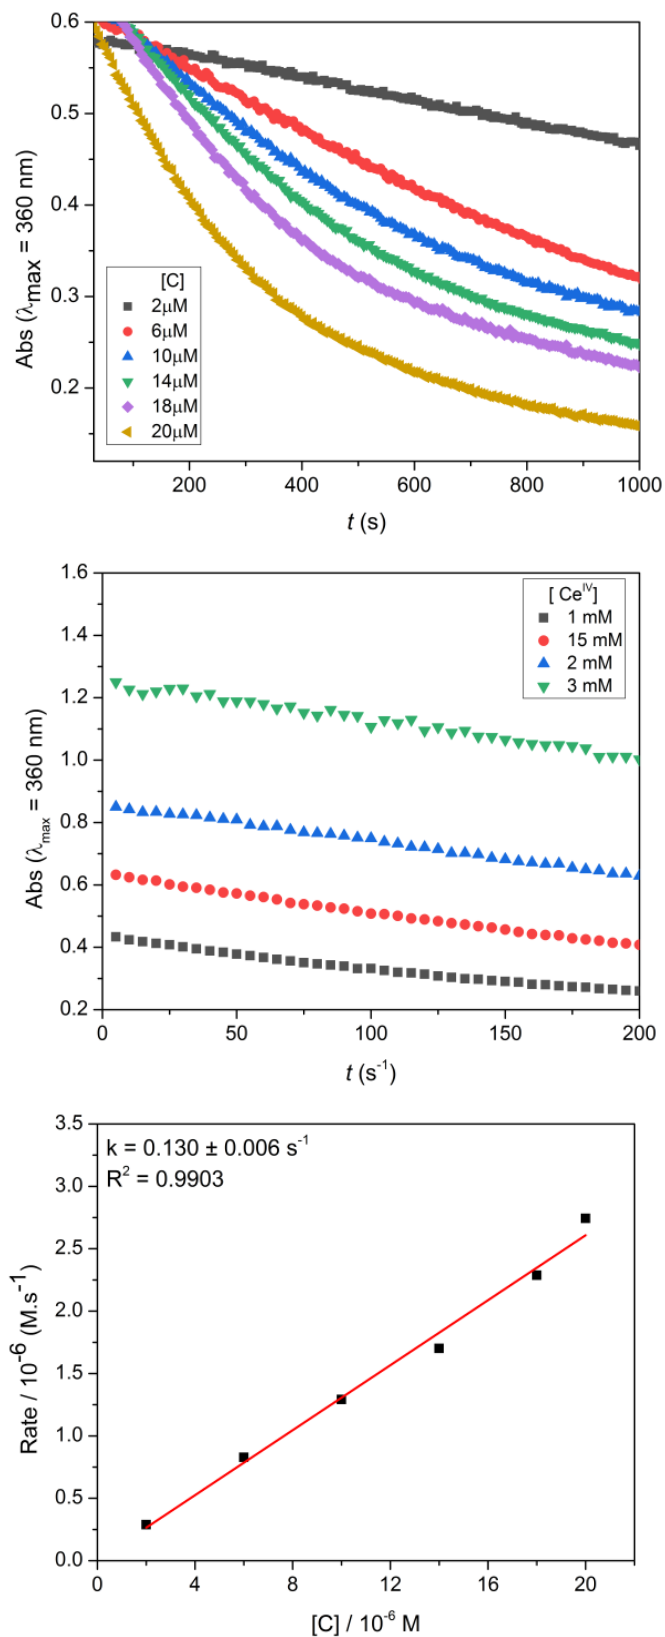

**Fig. S12** Absorbance decay monitored at 360 nm in aqueous solution as a function of time for different  $[RuRu(py)_4Ru]$  concentrations (top) and for different  $Ce(IV)$  concentrations (center). Plot of the rate constant vs  $[RuRu(py)_4Ru]$  concentrations (bottom). Conditions: pH = 1.0 (aqueous 0.1 M triflic acid) and  $T = 298$  K.

## Calculation of the number of transferred electrons

**Fig. S13** shows the fit of the plot of  $i_p$  vs the  $v^{1/2}$  used for the calculation of the number of transferred electrons according with the Randles-Ševčík equation (1) where  $i_p$  is the anodic peak current  $\alpha$ ,  $n$  is the number of transferred electrons,  $F$  is the Faraday constant (96500 C),  $A$  is the active area of the working electrode (0.0707 cm<sup>2</sup>),  $C$  is the catalyst concentration in mol cm<sup>-3</sup>,  $v$  is the scan rate in V s<sup>-1</sup>,  $D$  is the diffusion coefficient (cm<sup>2</sup> s<sup>-1</sup>) calculated from <sup>1</sup>H-DOSY experiments,  $T$  is the temperature in kelvin and  $R$  is the ideal gas constant (8.314 J mol<sup>-1</sup> K<sup>-1</sup>).

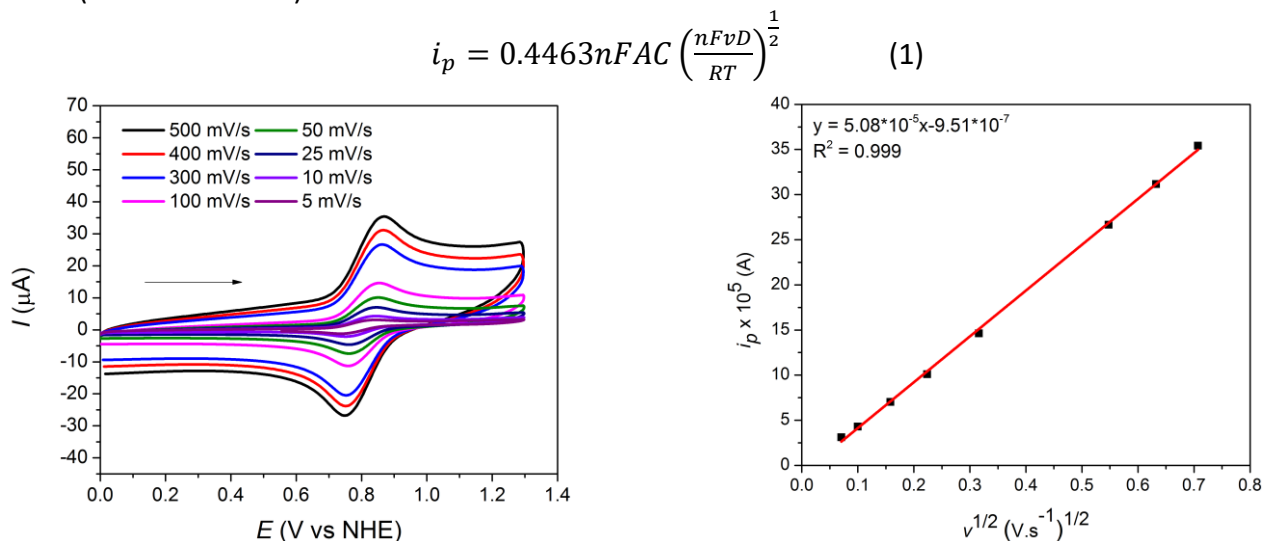

**Fig. S13** Left: CV of [RuRu(tbupy)<sub>4</sub>Ru] in CH<sub>2</sub>Cl<sub>2</sub> (0.2 M TBAPF<sub>6</sub>) at different scan rates. Right: plot of the anodic current  $i_p$  (Ru<sup>III/II</sup>) vs square root of the scan rate ( $v^{1/2}$ ). Conditions: WE (glassy carbon electrode), CE (platinum wire), RE (Ag wire) and [C] = 0.41 mM.

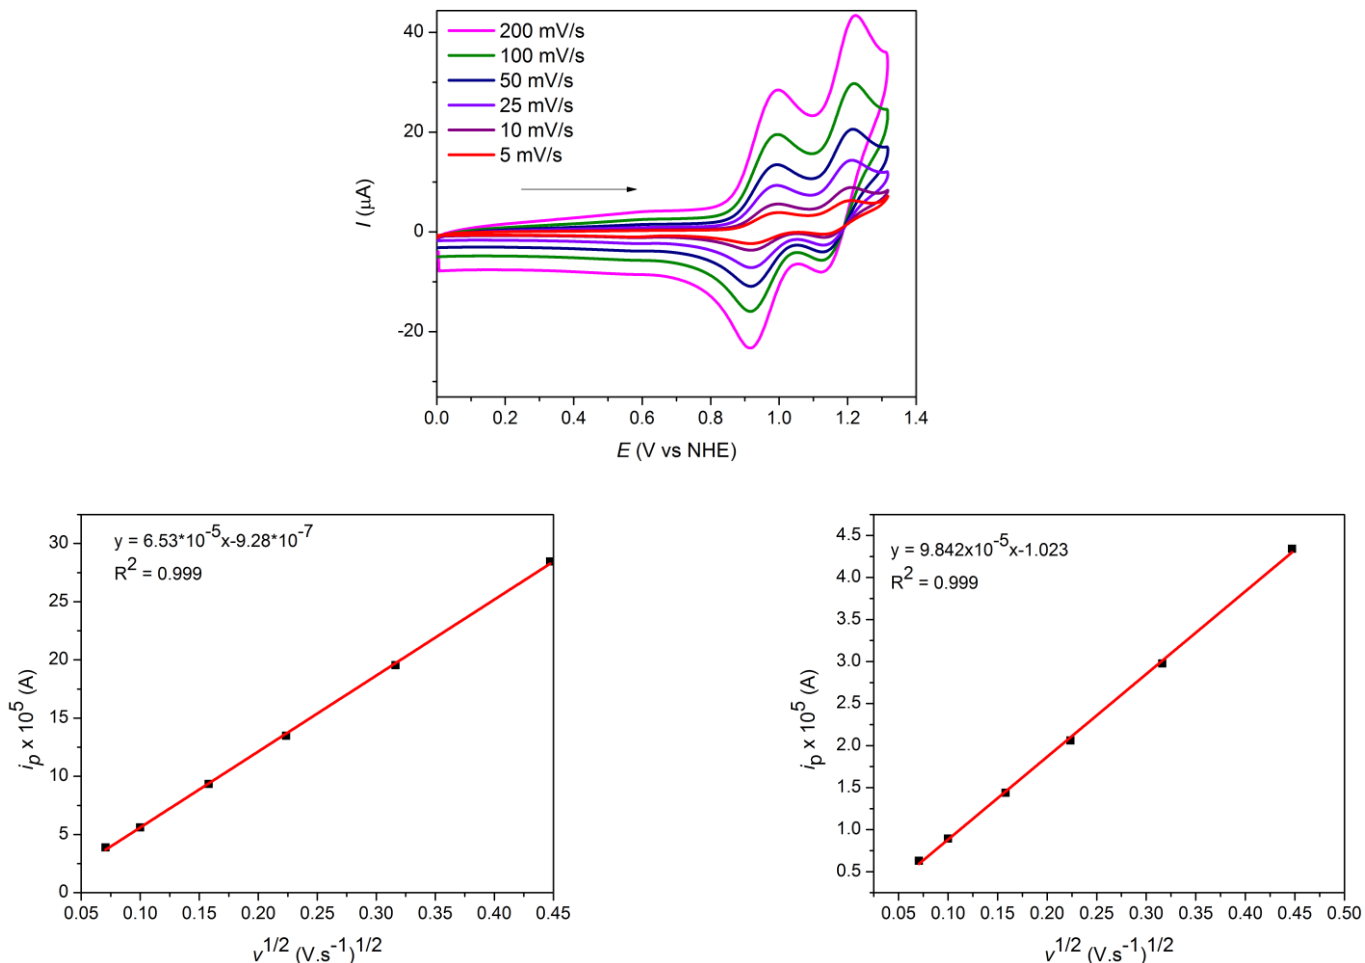

**Fig. S14** Upper graph: CV of  $[\text{RuRu}(\text{py})_4\text{Ru}]$  in 0.1 M triflic acid ( $\text{pH} = 1$ ) at different scan rates. Lower graphs: Plots of the anodic current  $i_p$  ( $\text{Ru}^{\text{III/II}}$ ) vs square root of the scan rate ( $v^{1/2}$ ) for the first oxidation (left) and the second oxidation (right) process. Conditions: WE (glassy carbon electrode), CE (platinum wire), RE (Ag/AgCl 3M NaCl) and  $[\text{C}] = 1.28 \text{ mM}$ .

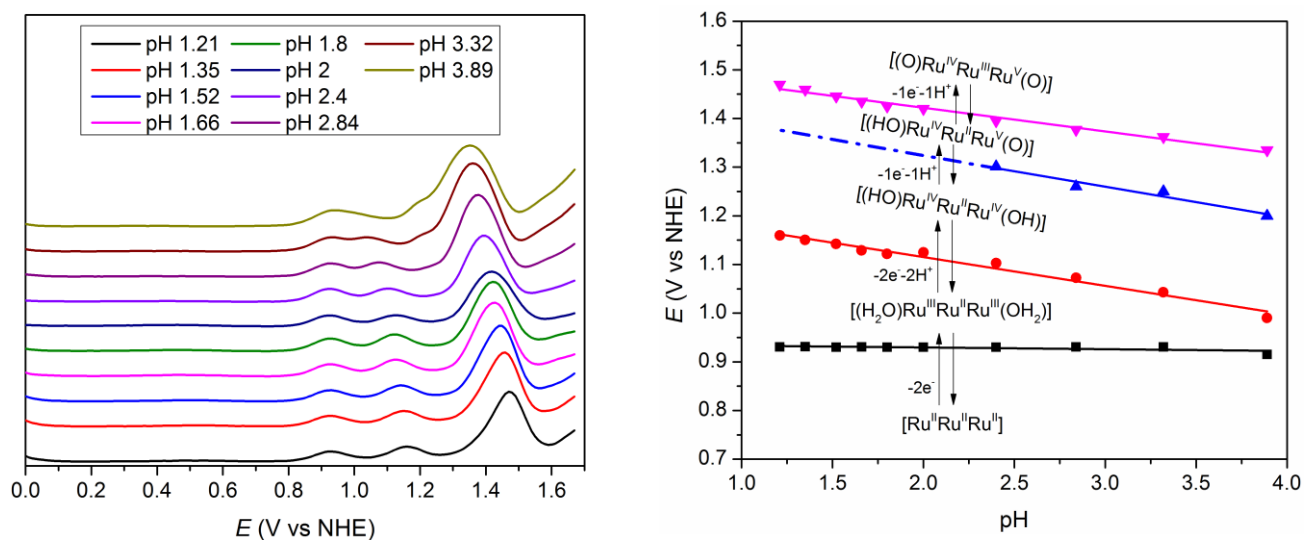

**Fig. S15** SWV of  $[\text{RuRu}(\text{py})_4\text{Ru}]$  at different pH's (left). Potential vs pH diagram (right). Conditions: WE (glassy carbon electrode), CE (platinum wire), RE (Ag/AgCl 3M NaCl).  $v = 100 \text{ mV/s}$ .

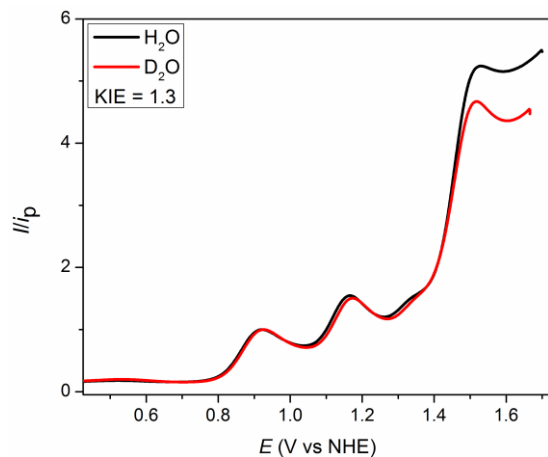

**Fig. S16** Anodic scan of the CVs for **[RuRu(py)<sub>4</sub>Ru]** in H<sub>2</sub>O and D<sub>2</sub>O at in 0.1 M triflic acid (pH = 1 and pD = 1). **[RuRu(py)<sub>4</sub>Ru]** = 1.20 mM.

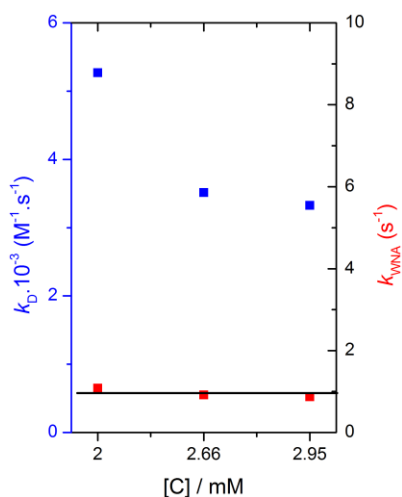

**Fig. S17** Plot of calculated the  $k_{WNA}$  and  $k_D$  vs complex concentration **[RuRu(py)<sub>4</sub>Ru]**.

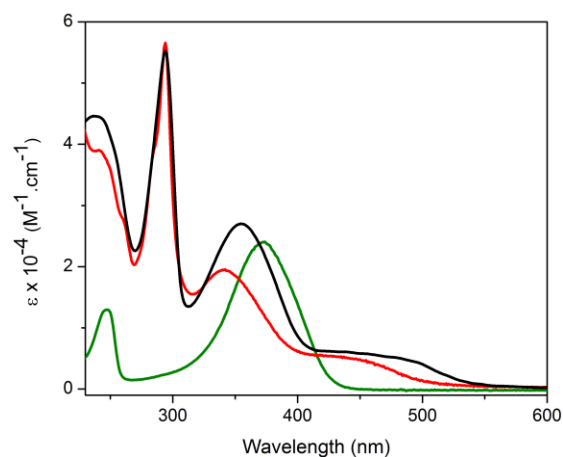

**Fig. S18** UV-visible spectra of complexes **trans-Ru(tbupy)<sub>4</sub>(CN)<sub>2</sub>** (olive trace) and **[RuRu(tbupy)<sub>4</sub>Ru]** (black trace) in CH<sub>2</sub>Cl<sub>2</sub> and **[RuRu(py)<sub>4</sub>Ru]** (red trace) in 0.1 M triflic acid (pH = 1) at 298 K.

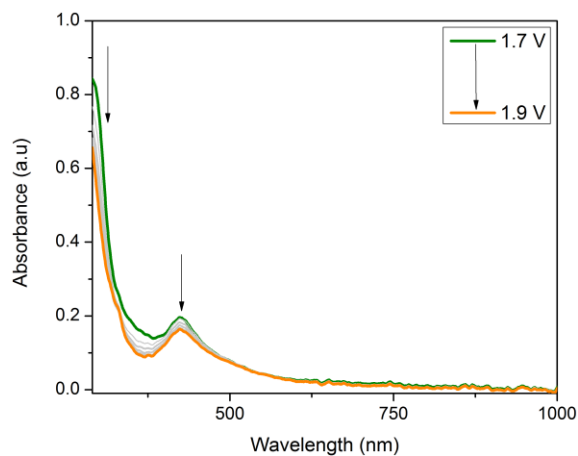

**Fig. S19** UV-Vis spectroelectrochemistry for **[RuRu(tbupy)<sub>4</sub>Ru]** in CH<sub>2</sub>Cl<sub>2</sub> (0.2 M TBAH). The arrows indicate observed changes. Conditions: WE (platinum), CE (platinum), RE (Ag/AgCl 3M NaCl).

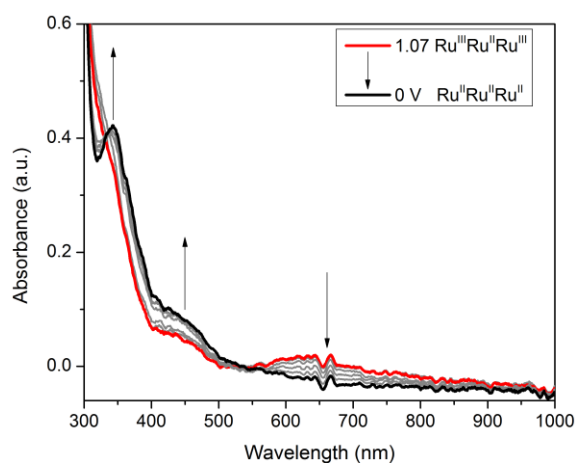

**Fig. S20** UV-Vis spectroelectrochemistry of **[RuRu(py)<sub>4</sub>Ru]** in 0.1 M triflic acid (pH = 1). The arrows indicate changes during the reduction process. Conditions: WE (platinum), CE (platinum), RE (Ag/AgCl 3M NaCl).

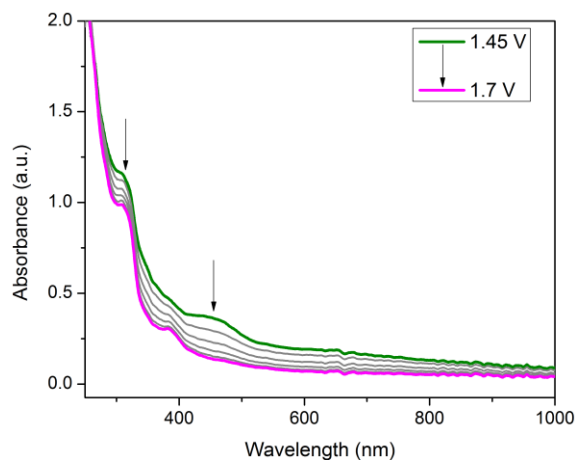

**Fig. S21** UV-Vis spectroelectrochemistry of **[RuRu(py)<sub>4</sub>Ru]** in 0.1 M triflic acid (pH = 1). The arrows indicate observed changes. Conditions: WE (platinum), CE (platinum), RE (Ag/AgCl 3M NaCl).



**Table S1.** Energies values and percentual group contributions of selected MOs of complex **[RuRu(tbupy)<sub>4</sub>Ru]** in their singlet ground state.

| MOs  | Energy (eV) | Ru <sub>tbupy</sub> | Ru <sub>bda</sub> | tbupy | bda |
|------|-------------|---------------------|-------------------|-------|-----|
| L+10 | -1.06       | 2                   | 1                 | 97    | 0   |
| L+9  | -1.23       | 5                   | 0                 | 95    | 0   |
| L+8  | -1.32       | 1                   | 1                 | 98    | 0   |
| L+7  | -1.37       | 4                   | 0                 | 96    | 0   |
| L+6  | -1.49       | 3                   | 1                 | 96    | 0   |
| L+5  | -1.87       | 0                   | 4                 | 0     | 96  |
| L+4  | -1.88       | 0                   | 3                 | 0     | 96  |
| L+3  | -2.16       | 0                   | 2                 | 0     | 98  |
| L+2  | -2.16       | 0                   | 2                 | 0     | 98  |
| L+1  | -2.55       | 0                   | 7                 | 0     | 92  |
| LUMO | -2.55       | 1                   | 7                 | 0     | 92  |
| HOMO | -5.35       | 25                  | 54                | 2     | 20  |
| H-1  | -5.41       | 22                  | 57                | 2     | 20  |
| H-2  | -5.48       | 31                  | 50                | 2     | 17  |
| H-3  | -5.58       | 81                  | 0                 | 19    | 0   |
| H-4  | -5.59       | 33                  | 48                | 3     | 17  |
| H-5  | -5.83       | 6                   | 66                | 1     | 27  |
| H-6  | -5.96       | 7                   | 66                | 1     | 26  |
| H-7  | -6.16       | 41                  | 33                | 6     | 21  |
| H-8  | -6.25       | 36                  | 39                | 6     | 19  |
| H-9  | -6.77       | 2                   | 5                 | 0     | 93  |
| H-10 | -6.78       | 1                   | 5                 | 0     | 94  |

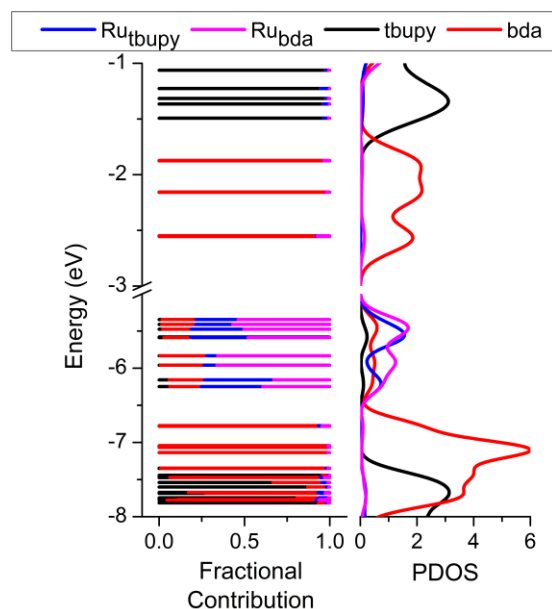

**Fig. S22** Molecular orbital diagram and partial density of states (PDOS) of complex **[RuRu(tbupy)<sub>4</sub>Ru]** in their singlet ground state.

**Table S2.** Energies values and percentual group contributions of selected alpha MOs of complex  $[\text{Ru}^{\text{III}}\text{Ru}^{\text{II}}(\text{tbupy})_4\text{Ru}^{\text{III}}]^{2+}$  in their triplet ground state.

| Alpha orbitals | Energy (eV) | Ru <sub>tbupy</sub> | Ru <sub>bda</sub> | tbupy | bda |
|----------------|-------------|---------------------|-------------------|-------|-----|
| L+10           | -2.01       | 3                   | 1                 | 96    | 0   |
| L+9            | -2.66       | 9                   | 59                | 0     | 32  |
| L+8            | -2.67       | 5                   | 60                | 0     | 34  |
| L+7            | -2.69       | 1                   | 62                | 0     | 37  |
| L+6            | -2.74       | 14                  | 56                | 0     | 29  |
| L+5            | -3.02       | 0                   | 2                 | 0     | 98  |
| L+4            | -3.02       | 0                   | 2                 | 0     | 98  |
| L+3            | -3.23       | 0                   | 1                 | 0     | 98  |
| L+2            | -3.23       | 0                   | 1                 | 0     | 98  |
| L+1            | -3.72       | 0                   | 4                 | 0     | 95  |
| LUMO           | -3.72       | 0                   | 4                 | 0     | 95  |
| HOMO           | -6.28       | 81                  | 0                 | 19    | 0   |
| H-1            | -6.49       | 85                  | 5                 | 9     | 1   |
| H-2            | -6.5        | 85                  | 4                 | 9     | 1   |
| H-3            | -7.55       | 3                   | 6                 | 1     | 90  |
| H-4            | -7.56       | 2                   | 8                 | 0     | 90  |
| H-5            | -7.68       | 6                   | 50                | 2     | 42  |
| H-6            | -7.71       | 6                   | 45                | 6     | 43  |
| H-7            | -7.74       | 3                   | 46                | 1     | 51  |
| H-8            | -7.75       | 3                   | 46                | 1     | 50  |
| H-9            | -7.86       | 0                   | 2                 | 0     | 98  |
| H-10           | -7.86       | 0                   | 2                 | 1     | 97  |

**Table S3.** Energies values and percentual group contributions of selected beta MOs of complex  $[\text{Ru}^{\text{III}}\text{Ru}^{\text{II}}(\text{tbupy})_4\text{Ru}^{\text{III}}]^{2+}$  in their triplet ground state.

| Beta orbitals | eV    | Ru <sub>tbupy</sub> | Ru <sub>bda</sub> | tbupy | bda |
|---------------|-------|---------------------|-------------------|-------|-----|
| L+10          | -2.83 | 2                   | 4                 | 92    | 2   |
| L+9           | -2.89 | 18                  | 54                | 3     | 25  |
| L+8           | -3.29 | 0                   | 2                 | 0     | 97  |
| L+7           | -3.29 | 0                   | 2                 | 0     | 97  |
| L+6           | -3.5  | 0                   | 1                 | 0     | 99  |
| L+5           | -3.5  | 0                   | 1                 | 0     | 99  |
| L+4           | -3.98 | 0                   | 4                 | 0     | 96  |
| L+3           | -3.98 | 0                   | 4                 | 0     | 96  |
| L+2           | -4.94 | 1                   | 72                | 0     | 27  |
| L+1           | -4.95 | 1                   | 72                | 0     | 27  |
| LUMO          | -5.88 | 79                  | 0                 | 21    | 0   |
| HOMO          | -7.73 | 13                  | 53                | 1     | 34  |
| H-1           | -7.81 | 7                   | 49                | 1     | 44  |
| H-2           | -7.84 | 3                   | 13                | 0     | 85  |
| H-3           | -7.85 | 2                   | 6                 | 0     | 92  |
| H-4           | -8.03 | 25                  | 46                | 3     | 27  |
| H-5           | -8.11 | 1                   | 3                 | 0     | 96  |
| H-6           | -8.12 | 1                   | 2                 | 0     | 97  |
| H-7           | -8.19 | 8                   | 55                | 2     | 34  |
| H-8           | -8.49 | 51                  | 5                 | 32    | 12  |
| H-9           | -8.57 | 35                  | 12                | 39    | 14  |
| H-10          | -8.68 | 0                   | 1                 | 1     | 98  |

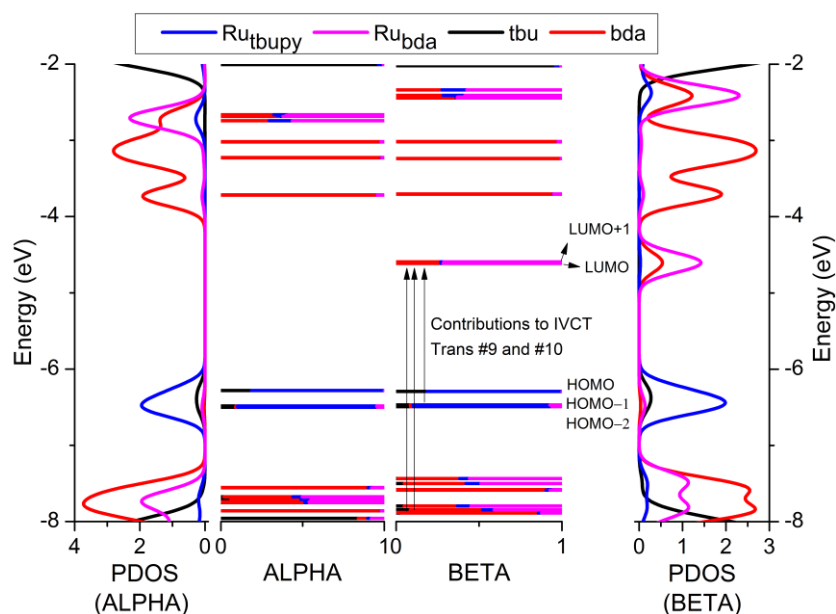

**Fig. S23** Molecular orbital diagram and partial density of states (PDOS) of complex  $[\text{Ru}^{\text{III}}\text{Ru}^{\text{II}}(\text{tbupy})_4\text{Ru}^{\text{III}}]^{2+}$  in their triplet ground state.

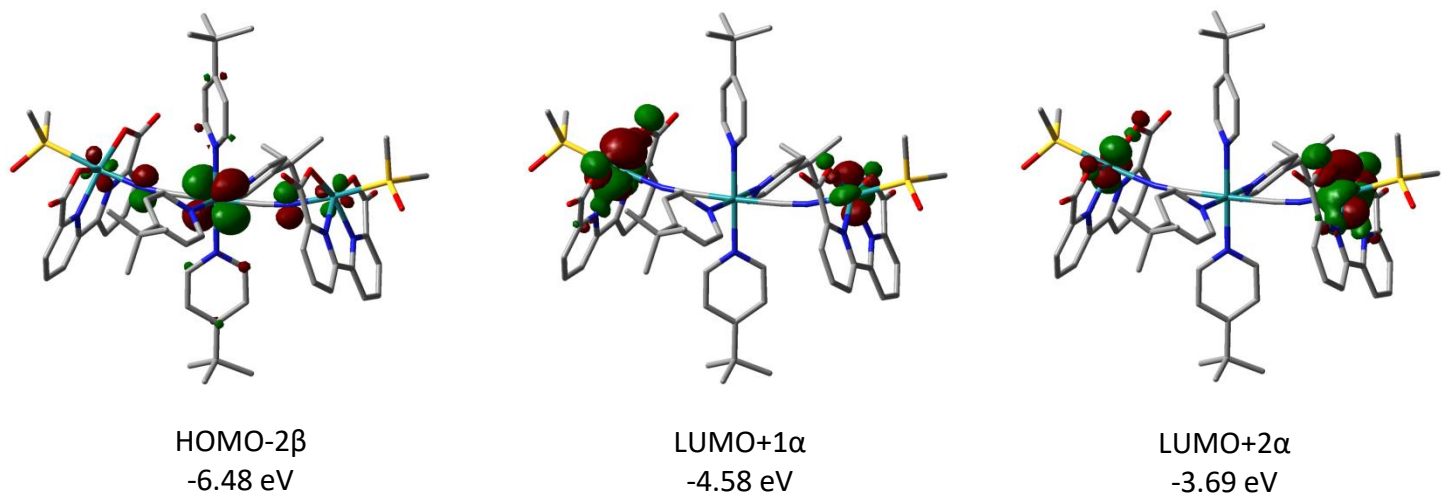

**Fig. S24** Molecular orbitals of complex  $[\text{Ru}^{\text{III}}\text{Ru}^{\text{II}}(\text{tbupy})_4\text{Ru}^{\text{III}}]^{2+}$  involved in MM'CT transitions.

**Table S4.** Energies values and percentual group contributions of selected alpha MOs of complex  $[\text{Ru}^{\text{III}}\text{Ru}^{\text{III}}(\text{tbupy})_4\text{Ru}^{\text{III}}]^{3+}$  in their quartet ground state.

| Alpha orbitals | eV    | Ru <sub>tbupy</sub> | Ru <sub>bda</sub> | tbupy | bda |
|----------------|-------|---------------------|-------------------|-------|-----|
| L+10           | -2.87 | 2                   | 1                 | 97    | 0   |
| L+9            | -3.03 | 0                   | 61                | 0     | 38  |
| L+8            | -3.05 | 0                   | 61                | 0     | 39  |
| L+7            | -3.11 | 13                  | 56                | 0     | 30  |
| L+6            | -3.25 | 17                  | 49                | 2     | 32  |
| L+5            | -3.31 | 0                   | 3                 | 0     | 96  |
| L+4            | -3.32 | 1                   | 5                 | 0     | 95  |
| L+3            | -3.5  | 0                   | 2                 | 0     | 98  |
| L+2            | -3.51 | 1                   | 3                 | 0     | 96  |
| L+1            | -4    | 0                   | 4                 | 0     | 96  |
| LUMO           | -4    | 0                   | 4                 | 0     | 96  |
| HOMO           | -7.82 | 2                   | 8                 | 0     | 90  |
| H-1            | -7.83 | 2                   | 8                 | 0     | 90  |
| H-2            | -8    | 10                  | 48                | 1     | 42  |
| H-3            | -8.05 | 4                   | 44                | 1     | 52  |
| H-4            | -8.08 | 4                   | 41                | 0     | 55  |
| H-5            | -8.1  | 2                   | 36                | 0     | 62  |
| H-6            | -8.12 | 1                   | 8                 | 0     | 91  |
| H-7            | -8.13 | 1                   | 15                | 0     | 84  |
| H-8            | -8.33 | 21                  | 49                | 3     | 27  |
| H-9            | -8.44 | 8                   | 53                | 4     | 35  |
| H-10           | -8.69 | 8                   | 1                 | 16    | 75  |

**Table S5.** Energies values and percentual group contributions of selected beta MOs of complex  $[\text{Ru}^{\text{III}}\text{Ru}^{\text{III}}(\text{tbupy})_4\text{Ru}^{\text{III}}]^{3+}$  in their quartet ground state.

| Beta orbitals | eV    | Ru <sub>tbupy</sub> | Ru <sub>bda</sub> | tbupy | bda |
|---------------|-------|---------------------|-------------------|-------|-----|
| L+10          | -2.83 | 2                   | 4                 | 92    | 2   |
| L+9           | -2.89 | 18                  | 54                | 3     | 25  |
| L+8           | -3.29 | 0                   | 2                 | 0     | 97  |
| L+7           | -3.29 | 0                   | 2                 | 0     | 97  |
| L+6           | -3.5  | 0                   | 1                 | 0     | 99  |
| L+5           | -3.5  | 0                   | 1                 | 0     | 99  |
| L+4           | -3.98 | 0                   | 4                 | 0     | 96  |
| L+3           | -3.98 | 0                   | 4                 | 0     | 96  |
| L+2           | -4.94 | 1                   | 72                | 0     | 27  |
| L+1           | -4.95 | 1                   | 72                | 0     | 27  |
| LUMO          | -5.88 | 79                  | 0                 | 21    | 0   |
| HOMO          | -7.73 | 13                  | 53                | 1     | 34  |
| H-1           | -7.81 | 7                   | 49                | 1     | 44  |
| H-2           | -7.84 | 3                   | 13                | 0     | 85  |
| H-3           | -7.85 | 2                   | 6                 | 0     | 92  |
| H-4           | -8.03 | 25                  | 46                | 3     | 27  |
| H-5           | -8.11 | 1                   | 3                 | 0     | 96  |
| H-6           | -8.12 | 1                   | 2                 | 0     | 97  |
| H-7           | -8.19 | 8                   | 55                | 2     | 34  |
| H-8           | -8.49 | 51                  | 5                 | 32    | 12  |
| H-9           | -8.57 | 35                  | 12                | 39    | 14  |
| H-10          | -8.68 | 0                   | 1                 | 1     | 98  |

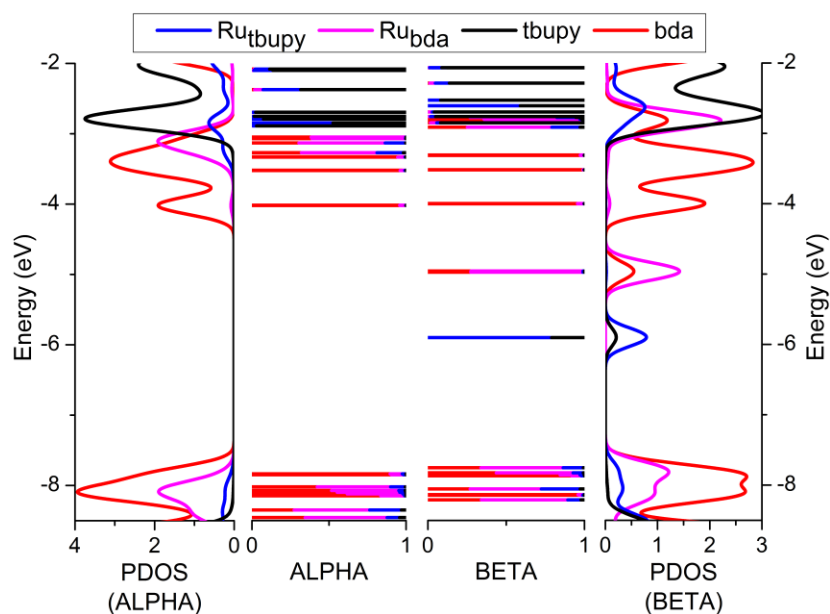

**Fig. S25** Molecular orbital diagram and partial density of states (PDOS) of complex  $[\text{Ru}^{\text{III}}\text{Ru}^{\text{III}}(\text{tbupy})_4\text{Ru}^{\text{III}}]^{3+}$  in their quartet ground state.

**Table S6.** (TD)DFT assignments for calculated UV-Vis transitions of complex **[RuRu(tbupy)<sub>4</sub>Ru]** in their singlet ground state.

| No. | Wavelength (nm) | Osc. Strength | Major contributions                                                    | Assignment                                                                 |
|-----|-----------------|---------------|------------------------------------------------------------------------|----------------------------------------------------------------------------|
| 6   | 516.7           | 0.0184        | H-4->L+1 (14%)<br>H-1->L+2 (14%)<br>HOMO->L+1 (27%)<br>HOMO->L+3 (19%) | d(Ru <sub>bda</sub> ,Ru <sub>tbupy</sub> )->π*(bda)                        |
| 8   | 506.4           | 0.0108        | H-4->L+1 (17%)<br>H-1->L+2 (16%)<br>HOMO->L+1 (10%)<br>HOMO->L+3 (24%) | d(Ru <sub>bda</sub> ,Ru <sub>tbupy</sub> )->π*(bda)                        |
| 16  | 456.0           | 0.0203        | H-5->LUMO (12%)<br>H-2->LUMO (11%)<br>H-2->L+3 (12%)<br>H-1->L+3 (10%) | d(Ru <sub>bda</sub> ) -> π*(bda)                                           |
| 32  | 406.1           | 0.0255        | H-4->L+5 (30%)<br>HOMO->L+5 (19%)                                      | d(Ru <sub>bda</sub> ,Ru <sub>tbupy</sub> )->π*(bda)                        |
| 34  | 398.1           | 0.0338        | H-6->LUMO (10%)<br>H-2->L+5 (29%)<br>H-1->L+5 (32%)                    | d(Ru <sub>bda</sub> ,Ru <sub>tbupy</sub> )>π*(bda,tbupy)                   |
| 51  | 370.0           | 0.0432        | H-3->L+6 (37%)<br>HOMO->L+6 (17%)                                      | d(Ru <sub>tbupy</sub> ) ->π*(tbupy)<br>d(Ru <sub>bda</sub> ) ->π*(bda)     |
| 53  | 368.4           | 0.0702        | H-6->L+2 (11%)<br>H-3->L+6 (12%)<br>HOMO->L+7 (21%)                    | d(Ru <sub>tbupy</sub> ) ->π*(tbupy)<br>d(Ru <sub>bda</sub> ) ->π*(bda)     |
| 59  | 354.8           | 0.0635        | H-3->L+7 (15%)<br>H-2->L+8 (21%)<br>H-1->L+8 (29%)                     | d(Ru <sub>bda</sub> ,Ru <sub>tbupy</sub> )->π*(tbupy)                      |
| 63  | 352.0           | 0.1255        | H-3->L+8 (36%)                                                         | d(Ru <sub>bda</sub> ,Ru <sub>tbupy</sub> )->π*(tbupy)                      |
| 64  | 351.6           | 0.1467        | H-3->L+7 (11%)<br>H-3->L+8 (16%)<br>H-2->L+9 (12%)<br>H-1->L+9 (15%)   | d(Ru <sub>bda</sub> ,Ru <sub>tbupy</sub> )->π*(tbupy)                      |
| 69  | 346.2           | 0.0995        | H-4->L+6 (57%)<br>HOMO->L+6 (11%)                                      | d(Ru <sub>bda</sub> ,Ru <sub>tbupy</sub> )->π*(tbupy)                      |
| 141 | 291.3           | 0.0693        | H-21->LUMO (10%)<br>H-18->LUMO (12%)                                   | d(Ru <sub>bda</sub> ,Ru <sub>tbupy</sub> )->π*(tbupy)                      |
| 166 | 282.9           | 0.1026        | H-8->L+8 (27%)<br>H-4->L+15 (17%)<br>HOMO->L+15 (14%)                  | d(Ru <sub>bda</sub> ,Ru <sub>tbupy</sub> )>π*(bda,tbupy)<br>π(bda)>π*(bda) |

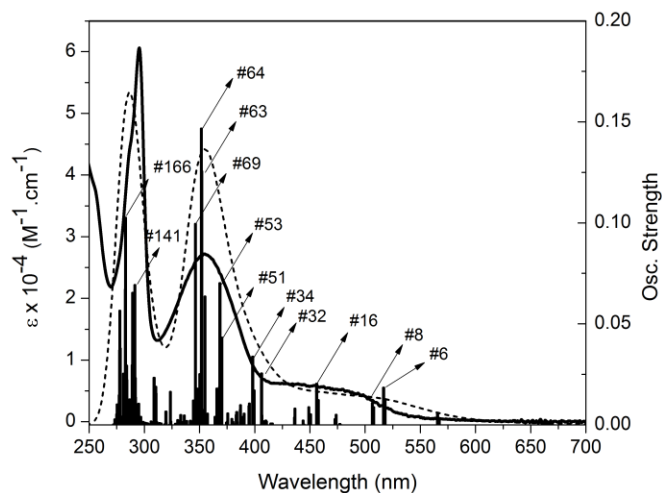

**Fig. S26** (TD)DFT-calculated (dashed curve) and experimental (solid curve) UV-visible absorption spectra of complex **[RuRu(tbupy)<sub>4</sub>Ru]** in their singlet ground state. Calculated transition are represented by black vertical bars.

**Table S7.** (TD)-DFT assignments for calculated UV-Vis transitions of complex **[Ru<sup>III</sup>Ru<sup>II</sup>(tbupy)<sub>4</sub>Ru<sup>III</sup>]<sup>2+</sup>** in their triplet ground state.

| No. | Wavelength (nm) | Osc. Strength | Major contributions                                                                                                                                | Assignment                                      |
|-----|-----------------|---------------|----------------------------------------------------------------------------------------------------------------------------------------------------|-------------------------------------------------|
| 9   | 817.7           | 0.0114        | H-8 $\beta$ ->LUMO $\beta$ (13%)<br>H-7 $\beta$ ->LUMO $\beta$ (10%)<br>H-2 $\beta$ ->LUMO $\beta$ (53%)                                           | d(Ru <sub>tbupy</sub> ) ->d(Ru <sub>bda</sub> ) |
| 10  | 811.9           | 0.0053        | H-8 $\beta$ ->L+1 $\beta$ (12%),<br>H-7 $\beta$ ->L+1 $\beta$ (11%)<br>H-2 $\beta$ ->L+1 $\beta$ (52%)                                             | d(Ru <sub>tbupy</sub> ) ->d(Ru <sub>bda</sub> ) |
| 23  | 536.3           | 0.0075        | H-2 $\alpha$ ->LUMO $\alpha$ (49%)<br>H-2 $\beta$ ->L+2 $\beta$ (39%)                                                                              | d(Ru <sub>tbupy</sub> ) -> $\pi^*$ (bda)        |
| 24  | 535.2           | 0.0038        | H-2 $\alpha$ ->L+1 $\alpha$ (48%)<br>H-2 $\beta$ ->L+3 $\beta$ (40%)                                                                               | d(Ru <sub>tbupy</sub> ) -> $\pi^*$ (bda)        |
| 102 | 391.7           | 0.0122        | H-6 $\beta$ ->L+2 $\beta$ (21%)<br>H-5 $\beta$ ->L+3 $\beta$ (27%)                                                                                 | d(Ru <sub>tbupy</sub> ) -> $\pi^*$ (bda)        |
| 140 | 355.5           | 0.0459        | HOMO $\alpha$ ->L+10 $\alpha$ (38%)<br>HOMO $\beta$ ->L+12 $\beta$ (42%)                                                                           | d(Ru <sub>tbupy</sub> ) -> $\pi^*$ (tbupy)      |
| 159 | 345.9           | 0.0521        | H-1 $\alpha$ ->L+28 $\alpha$ (11%)<br>HOMO $\alpha$ ->L+11 $\alpha$ (23%)<br>HOMO $\beta$ ->L+13 $\beta$ (28%)                                     | d(Ru <sub>tbupy</sub> ) -> $\pi^*$ (tbupy)      |
| 160 | 345.8           | 0.0417        | H-1 $\alpha$ ->L+28 $\alpha$ (15%)<br>HOMO $\alpha$ ->L+11 $\alpha$ (20%)<br>HOMO $\beta$ ->L+13 $\beta$ (17%)                                     | d(Ru <sub>tbupy</sub> ) -> $\pi^*$ (tbupy)      |
| 189 | 334.7           | 0.0799        | H-2 $\alpha$ ->L+10 $\alpha$ (13%)<br>HOMO $\alpha$ ->L+13 $\alpha$ (28%)<br>H-2 $\beta$ ->L+12 $\beta$ (12%)<br>HOMO $\beta$ ->L+15 $\beta$ (29%) | d(Ru <sub>tbupy</sub> ) -> $\pi^*$ (tbupy)      |
| 218 | 322.1           | 0.1031        | H-1 $\alpha$ ->L+13 $\alpha$ (42%)<br>H-1 $\beta$ ->L+14 $\beta$ (32%)                                                                             | d(Ru <sub>tbupy</sub> ) -> $\pi^*$ (tbupy)      |
| 321 | 290.9           | 0.2091        | HOMO $\beta$ ->L+16 $\beta$ (13%)                                                                                                                  | d(Ru <sub>tbupy</sub> ) -> $\pi^*$ (bda)        |

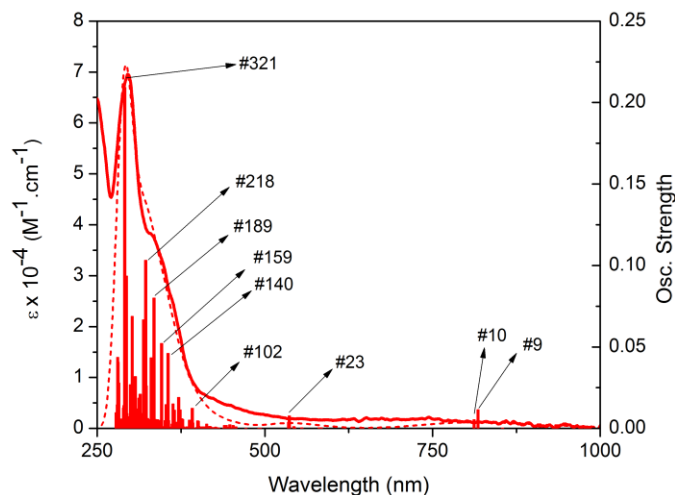

**Fig. S27** Left: (TD)DFT-calculated (dashed curve) and experimental (solid curve) UV-visible absorption spectra of complex  $[\text{Ru}^{\text{III}}\text{Ru}^{\text{II}}(\text{tbupy})_4\text{Ru}^{\text{III}}]^{2+}$  in their triplet ground state. Calculated transition are represented by red vertical bars.

**Table S8.** (TD)DFT assignments for calculated UV-Vis transitions of complex  $[\text{Ru}^{\text{III}}\text{Ru}^{\text{III}}(\text{tbupy})_4\text{Ru}^{\text{III}}]^{3+}$  in their quartet ground state.

| No. | Wavelength (nm) | Osc. Strength | Major contributions                                                                                                                            | Assignment                                                                             |
|-----|-----------------|---------------|------------------------------------------------------------------------------------------------------------------------------------------------|----------------------------------------------------------------------------------------|
| 12  | 676.3           | 0.0033        | H-9 $\beta$ $\rightarrow$ LUMO $\beta$ (43%)<br>H-4 $\beta$ $\rightarrow$ LUMO $\beta$ (51%)                                                   | $d(\text{Ru}_{\text{tbupy}}), \pi(\text{bda}) \rightarrow d(\text{Ru}_{\text{tbupy}})$ |
| 23  | 521.8           | 0.0066        | H-20 $\beta$ $\rightarrow$ LUMO $\beta$ (82%)                                                                                                  | $\pi(\text{tbupy}) \rightarrow d(\text{Ru}_{\text{tbupy}})$                            |
| 34  | 481.8           | 0.083         | H-22 $\beta$ $\rightarrow$ LUMO $\beta$ (83%)                                                                                                  | $\pi(\text{tbupy}) \rightarrow d(\text{Ru}_{\text{tbupy}})$                            |
| 35  | 478.7           | 0.0733        | H-21 $\beta$ $\rightarrow$ LUMO $\beta$ (75%)                                                                                                  | $\pi(\text{tbupy}) \rightarrow d(\text{Ru}_{\text{tbupy}})$                            |
| 94  | 373.9           | 0.043         | H-26 $\beta$ $\rightarrow$ L+2 $\beta$ (40%)<br>H-14 $\beta$ $\rightarrow$ L+2 $\beta$ (19%)                                                   | $\pi(\text{tbupy}, \text{bda}) \rightarrow d(\text{Ru}_{\text{tbupy}})$                |
| 97  | 370.0           | 0.0117        | H-26 $\beta$ $\rightarrow$ L+2 $\beta$ (11%)<br>H-14 $\beta$ $\rightarrow$ L+2 $\beta$ (67%)                                                   | $\pi(\text{tbupy}) \rightarrow d(\text{Ru}_{\text{bda}})$                              |
| 257 | 291.2           | 0.0804        | H-12 $\alpha$ $\rightarrow$ L+1 $\alpha$ (13%)<br>H-2 $\alpha$ $\rightarrow$ L+3 $\alpha$ (12%)<br>H-4 $\beta$ $\rightarrow$ L+8 $\beta$ (10%) | $d(\text{Ru}_{\text{bda}}) \rightarrow \pi^*(\text{bda})$                              |
| 269 | 288.1           | 0.0869        | H-3 $\beta$ $\rightarrow$ L+13 $\beta$ (10%)<br>H-2 $\beta$ $\rightarrow$ L+9 $\beta$ (16%)                                                    | $\pi(\text{bda}) \rightarrow d(\text{Ru}_{\text{bda}})$                                |



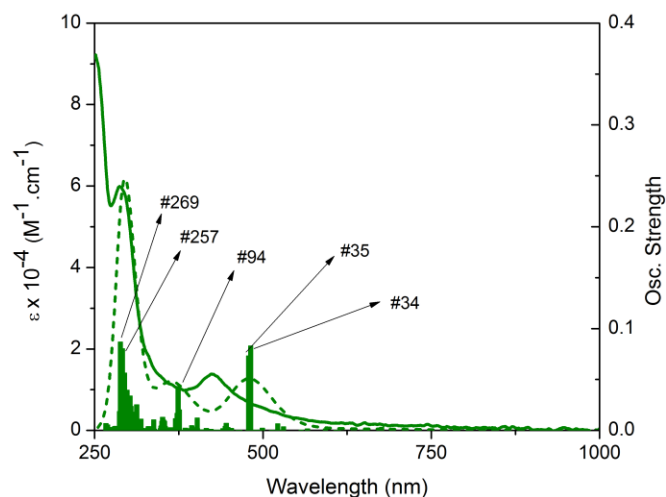

**Fig. S28** (TD)DFT-calculated (dashed curve) and experimental (solid curve) UV-visible absorption spectra of complex  $[\text{Ru}^{\text{III}}\text{Ru}^{\text{III}}(\text{tbupy})_4\text{Ru}^{\text{III}}]^{3+}$  in their quartet ground state. Calculated transition are represented by green vertical bars.

**Table S9.** Energies values and percentual group contributions of selected MOs of complex  $[\text{Ru}^{\text{II}}\text{Ru}^{\text{II}}(\text{py})_4\text{Ru}^{\text{II}}]$  in their singlet ground state.

| MO's | Energy (eV) | Ru <sub>py</sub> | Ru <sub>bda</sub> | py | bda |
|------|-------------|------------------|-------------------|----|-----|
| L+10 | -1.2        | 1                | 1                 | 98 | 0   |
| L+9  | -1.5        | 6                | 0                 | 94 | 0   |
| L+8  | -1.6        | 2                | 1                 | 97 | 0   |
| L+7  | -1.61       | 3                | 0                 | 96 | 1   |
| L+6  | -1.63       | 2                | 1                 | 97 | 0   |
| L+5  | -1.93       | 0                | 4                 | 0  | 96  |
| L+4  | -1.94       | 0                | 3                 | 0  | 96  |
| L+3  | -2.2        | 0                | 1                 | 0  | 98  |
| L+2  | -2.21       | 0                | 1                 | 0  | 98  |
| L+1  | -2.57       | 0                | 7                 | 0  | 92  |
| LUMO | -2.58       | 0                | 7                 | 0  | 92  |
| HOMO | -5.48       | 19               | 59                | 1  | 21  |
| H-1  | -5.54       | 10               | 67                | 1  | 23  |
| H-2  | -5.61       | 37               | 47                | 2  | 14  |
| H-3  | -5.73       | 32               | 49                | 2  | 16  |
| H-4  | -5.81       | 83               | 0                 | 17 | 0   |
| H-5  | -5.94       | 6                | 67                | 1  | 27  |
| H-6  | -6.05       | 7                | 68                | 0  | 25  |
| H-7  | -6.31       | 48               | 28                | 6  | 18  |
| H-8  | -6.39       | 43               | 34                | 6  | 17  |
| H-9  | -6.91       | 2                | 5                 | 0  | 93  |
| H-10 | -6.92       | 2                | 5                 | 0  | 94  |

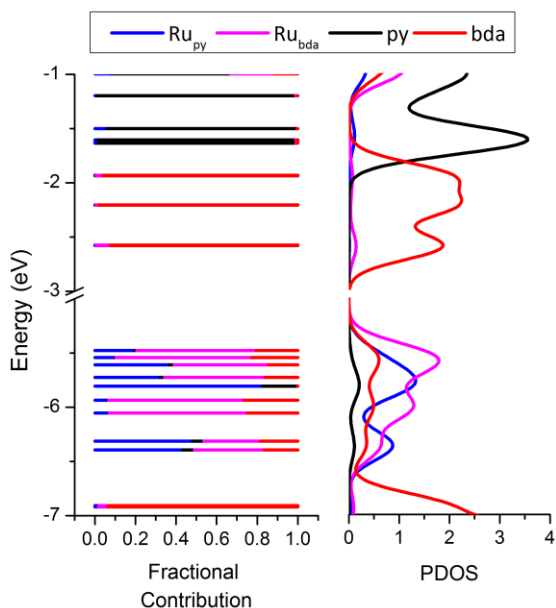

**Fig. S29** Molecular orbital diagram and partial density of states (PDOS) of complex  $[\text{Ru}^{\text{II}}\text{Ru}^{\text{II}}(\text{py})_4\text{Ru}^{\text{II}}]$  in their singlet ground state.

**Table S10.** Energies values and percentual group contributions of selected alpha MOs of the complex  $[\text{Ru}^{\text{III}}\text{Ru}^{\text{II}}(\text{py})_4\text{Ru}^{\text{III}}]^{2+}$  in their triplet ground state.

| MOs  | Energy (eV) | Ru <sub>py</sub> | Ru <sub>bda</sub> | py | bda | H <sub>2</sub> O |
|------|-------------|------------------|-------------------|----|-----|------------------|
| L+10 | -1.74       | 2                | 1                 | 97 | 0   | 0                |
| L+9  | -2.23       | 15               | 57                | 0  | 27  | 1                |
| L+8  | -2.3        | 14               | 57                | 0  | 28  | 1                |
| L+7  | -2.49       | 0                | 56                | 0  | 44  | 0                |
| L+6  | -2.5        | 0                | 54                | 0  | 46  | 0                |
| L+5  | -2.56       | 0                | 10                | 0  | 90  | 0                |
| L+4  | -2.57       | 0                | 12                | 0  | 88  | 0                |
| L+3  | -2.73       | 0                | 1                 | 0  | 98  | 0                |
| L+2  | -2.74       | 0                | 2                 | 0  | 98  | 0                |
| L+1  | -3.24       | 0                | 4                 | 0  | 96  | 0                |
| LUMO | -3.24       | 0                | 4                 | 0  | 96  | 0                |
| HOMO | -6.02       | 83               | 0                 | 17 | 0   | 0                |
| H-1  | -6.18       | 86               | 5                 | 8  | 1   | 0                |
| H-2  | -6.18       | 87               | 5                 | 7  | 1   | 0                |
| H-3  | -6.84       | 0                | 46                | 0  | 43  | 10               |
| H-4  | -6.84       | 0                | 46                | 0  | 43  | 10               |
| H-5  | -7.22       | 3                | 7                 | 0  | 89  | 0                |
| H-6  | -7.23       | 3                | 8                 | 0  | 89  | 0                |
| H-7  | -7.32       | 5                | 50                | 1  | 43  | 0                |
| H-8  | -7.37       | 6                | 44                | 3  | 47  | 0                |
| H-9  | -7.51       | 0                | 3                 | 0  | 97  | 0                |
| H-10 | -7.52       | 0                | 3                 | 0  | 96  | 0                |

**Table S11.** Energies values and percentual group contributions of selected beta MOs of the complex  $[\text{Ru}^{\text{III}}\text{Ru}^{\text{II}}(\text{py})_4\text{Ru}^{\text{III}}]^{2+}$  in their triplet ground state.

| MOs  | Energy (eV) | Ru <sub>py</sub> | Ru <sub>bda</sub> | py | bda | H <sub>2</sub> O |
|------|-------------|------------------|-------------------|----|-----|------------------|
| L+10 | -1.94       | 14               | 59                | 0  | 26  | 1                |
| L+9  | -2.24       | 0                | 64                | 0  | 36  | 0                |
| L+8  | -2.26       | 0                | 64                | 0  | 36  | 0                |
| L+7  | -2.54       | 0                | 3                 | 0  | 97  | 0                |
| L+6  | -2.55       | 0                | 3                 | 0  | 97  | 0                |
| L+5  | -2.73       | 0                | 1                 | 0  | 99  | 0                |
| L+4  | -2.73       | 0                | 1                 | 0  | 99  | 0                |
| L+3  | -3.2        | 0                | 8                 | 0  | 92  | 0                |
| L+2  | -3.21       | 0                | 8                 | 0  | 92  | 0                |
| L+1  | -3.74       | 0                | 68                | 0  | 26  | 6                |
| LUMO | -3.74       | 0                | 68                | 0  | 26  | 6                |
| HOMO | -6.02       | 83               | 0                 | 17 | 0   | 0                |
| H-1  | -6.15       | 84               | 7                 | 7  | 2   | 0                |
| H-2  | -6.15       | 83               | 8                 | 7  | 2   | 0                |
| H-3  | -7.07       | 5                | 58                | 1  | 36  | 0                |
| H-4  | -7.14       | 9                | 50                | 3  | 38  | 0                |
| H-5  | -7.2        | 4                | 18                | 1  | 77  | 0                |
| H-6  | -7.21       | 4                | 9                 | 1  | 86  | 0                |
| H-7  | -7.36       | 8                | 51                | 2  | 38  | 1                |
| H-8  | -7.44       | 12               | 54                | 5  | 29  | 1                |
| H-9  | -7.51       | 0                | 1                 | 0  | 99  | 0                |
| H-10 | -7.51       | 0                | 1                 | 0  | 99  | 0                |

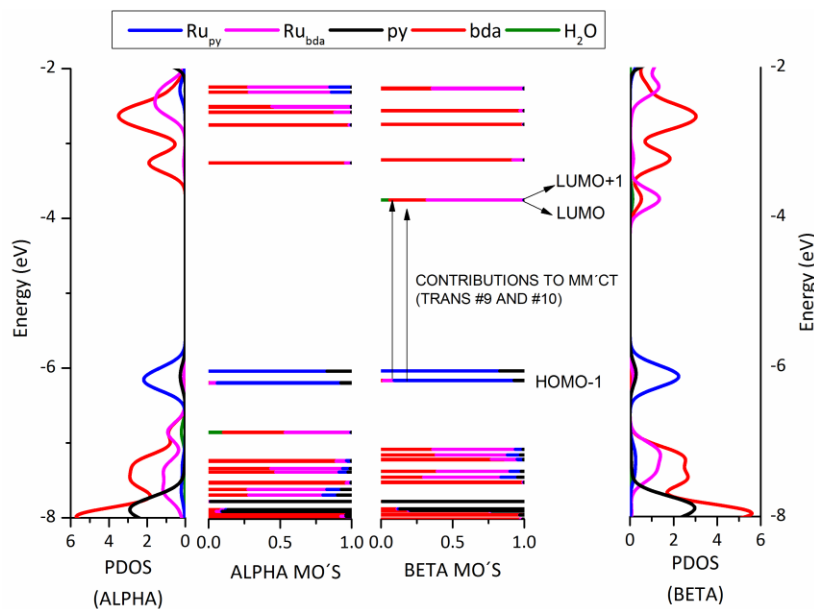

**Fig. S30** Molecular orbital diagram and partial density of states (PDOS) of complex  $[\text{Ru}^{\text{III}}\text{Ru}^{\text{II}}(\text{py})_4\text{Ru}^{\text{III}}]^{2+}$  in their triplet ground state.

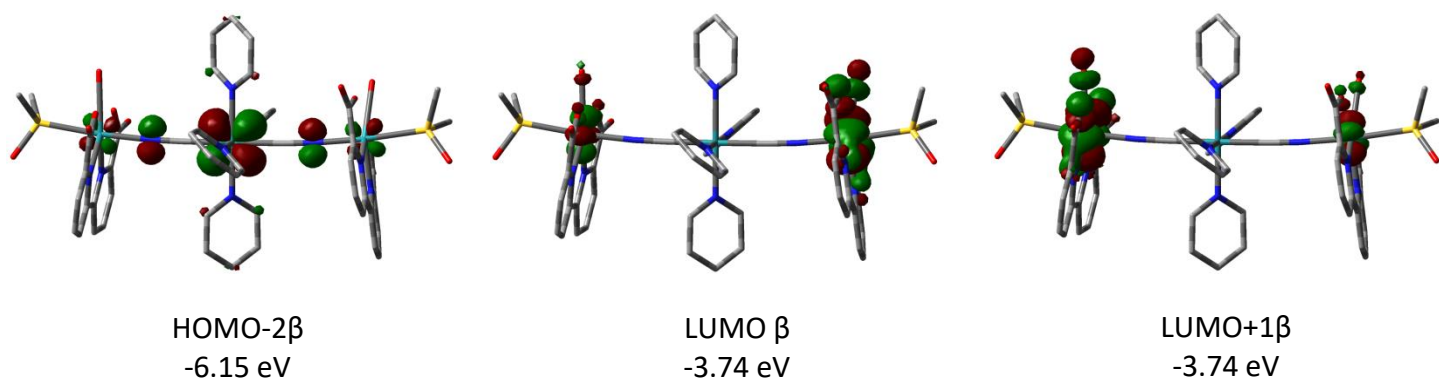

**Fig. S31** Molecular orbitals of complex  $[\text{Ru}^{\text{III}}\text{Ru}^{\text{II}}(\text{py})_4\text{Ru}^{\text{III}}]^{2+}$  involved in MM'CT transitions #9 and #10.

**Table S12.** Energies values and percentual group contributions of selected alpha MOs of the complex  $[\text{Ru}^{\text{V}}\text{Ru}^{\text{II}}(\text{py})_4\text{Ru}^{\text{IV}}]^{2+}$  in their doublet ground state.

| MOs  | Energy (eV) | Ru <sub>py</sub> | Ru <sub>bdaOH</sub> | Ru <sub>bdaO</sub> | py | bda <sub>OH</sub> | bda <sub>O</sub> | OH | O  |
|------|-------------|------------------|---------------------|--------------------|----|-------------------|------------------|----|----|
| L+10 | -2.66       | 10               | 1                   | 49                 | 0  | 0                 | 23               | 0  | 17 |
| L+9  | -2.71       | 0                | 0                   | 1                  | 0  | 2                 | 97               | 0  | 0  |
| L+8  | -2.72       | 0                | 1                   | 0                  | 0  | 97                | 2                | 0  | 0  |
| L+7  | -2.86       | 0                | 0                   | 2                  | 0  | 0                 | 97               | 0  | 1  |
| L+6  | -2.87       | 0                | 1                   | 0                  | 0  | 99                | 0                | 0  | 0  |
| L+5  | -3.41       | 0                | 0                   | 4                  | 0  | 0                 | 95               | 0  | 1  |
| L+4  | -3.43       | 0                | 5                   | 0                  | 0  | 95                | 0                | 0  | 0  |
| L+3  | -3.57       | 1                | 55                  | 0                  | 0  | 31                | 0                | 13 | 0  |
| L+2  | -3.79       | 6                | 0                   | 54                 | 0  | 0                 | 35               | 0  | 5  |
| L+1  | -3.9        | 0                | 60                  | 0                  | 0  | 32                | 0                | 8  | 0  |
| LUMO | -4.39       | 0                | 0                   | 56                 | 0  | 0                 | 31               | 0  | 13 |
| HOMO | -6.16       | 83               | 0                   | 0                  | 17 | 0                 | 0                | 0  | 0  |
| H-1  | -6.38       | 88               | 2                   | 1                  | 8  | 0                 | 0                | 0  | 0  |
| H-2  | -6.4        | 88               | 2                   | 1                  | 9  | 0                 | 0                | 0  | 0  |
| H-3  | -7.33       | 3                | 5                   | 0                  | 0  | 91                | 0                | 1  | 0  |
| H-4  | -7.49       | 3                | 0                   | 6                  | 0  | 0                 | 88               | 0  | 2  |
| H-5  | -7.61       | 1                | 5                   | 0                  | 0  | 94                | 0                | 0  | 0  |
| H-6  | -7.7        | 3                | 31                  | 0                  | 3  | 53                | 0                | 9  | 0  |
| H-7  | -7.78       | 1                | 6                   | 0                  | 1  | 63                | 0                | 28 | 0  |
| H-8  | -7.79       | 0                | 0                   | 1                  | 7  | 0                 | 92               | 0  | 0  |
| H-9  | -7.8        | 0                | 1                   | 0                  | 90 | 1                 | 8                | 0  | 0  |
| H-10 | -7.87       | 4                | 8                   | 3                  | 76 | 2                 | 6                | 1  | 0  |

**Table S13.** Energies values and percentual group contributions of selected beta MOs of the complex  $[\text{Ru}^{\text{V}}\text{Ru}^{\text{II}}(\text{py})_4\text{Ru}^{\text{IV}}]^{2+}$  in their doublet ground state.

| MOs  | Energy (eV) | Ru <sub>py</sub> | Ru <sub>bdaOH</sub> | Ru <sub>bdaO</sub> | py | bda <sub>OH</sub> | bda <sub>O</sub> | OH | O  |
|------|-------------|------------------|---------------------|--------------------|----|-------------------|------------------|----|----|
| L+10 | -2.71       | 0                | 0                   | 1                  | 0  | 2                 | 97               | 0  | 0  |
| L+9  | -2.72       | 0                | 1                   | 0                  | 0  | 97                | 2                | 0  | 0  |
| L+8  | -2.85       | 0                | 0                   | 1                  | 0  | 0                 | 98               | 0  | 1  |
| L+7  | -2.87       | 0                | 1                   | 0                  | 0  | 99                | 0                | 0  | 0  |
| L+6  | -3.29       | 0                | 0                   | 6                  | 0  | 0                 | 88               | 0  | 6  |
| L+5  | -3.43       | 0                | 5                   | 0                  | 0  | 95                | 0                | 0  | 0  |
| L+4  | -3.57       | 1                | 52                  | 4                  | 0  | 29                | 2                | 12 | 1  |
| L+3  | -3.59       | 6                | 4                   | 53                 | 0  | 2                 | 28               | 1  | 7  |
| L+2  | -3.9        | 0                | 60                  | 0                  | 0  | 32                | 0                | 8  | 0  |
| L+1  | -4.17       | 0                | 0                   | 54                 | 0  | 0                 | 24               | 0  | 21 |
| LUMO | -4.68       | 2                | 0                   | 30                 | 0  | 0                 | 16               | 0  | 51 |
| HOMO | -6.15       | 83               | 0                   | 0                  | 17 | 0                 | 0                | 0  | 0  |
| H-1  | -6.38       | 88               | 2                   | 1                  | 8  | 0                 | 0                | 0  | 0  |
| H-2  | -6.38       | 87               | 2                   | 0                  | 8  | 0                 | 1                | 0  | 1  |
| H-3  | -7.33       | 3                | 5                   | 0                  | 0  | 91                | 0                | 1  | 0  |
| H-4  | -7.51       | 3                | 0                   | 7                  | 0  | 0                 | 90               | 0  | 0  |
| H-5  | -7.61       | 1                | 5                   | 0                  | 0  | 94                | 0                | 0  | 0  |
| H-6  | -7.7        | 3                | 31                  | 0                  | 3  | 53                | 0                | 9  | 0  |
| H-7  | -7.76       | 0                | 0                   | 0                  | 1  | 0                 | 76               | 0  | 22 |
| H-8  | -7.78       | 1                | 6                   | 0                  | 2  | 61                | 3                | 28 | 0  |
| H-9  | -7.79       | 0                | 0                   | 1                  | 4  | 2                 | 91               | 1  | 0  |
| H-10 | -7.8        | 0                | 1                   | 0                  | 92 | 1                 | 6                | 0  | 0  |

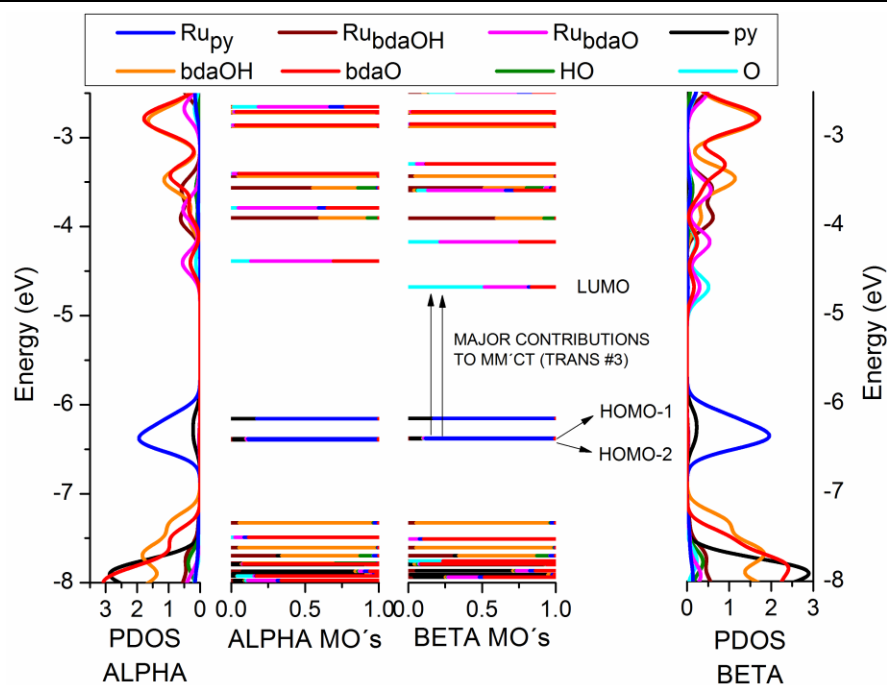

**Fig. S32** Molecular orbital diagram and partial density of states (PDOS) of complex  $[\text{Ru}^{\text{V}}\text{Ru}^{\text{II}}(\text{py})_4\text{Ru}^{\text{IV}}]^{2+}$  in their doublet ground state.

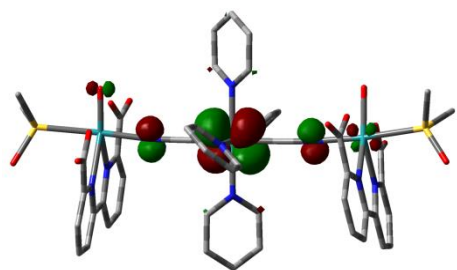

HOMO-2 $\beta$   
-6.38 eV

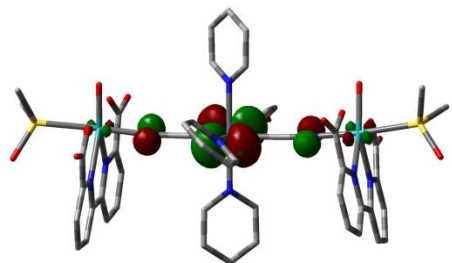

HOMO-1 $\beta$   
-6.38 eV

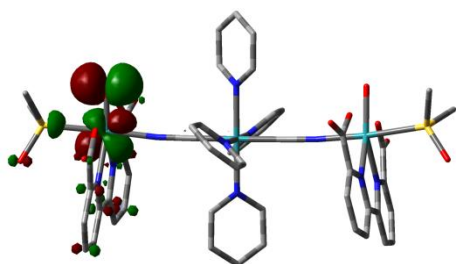

LUMO  $\beta$   
-4.68 eV

Fig. S33 Molecular orbitals of complex  $[\text{Ru}^{\text{V}}\text{Ru}^{\text{II}}(\text{py})_4\text{Ru}^{\text{IV}}]^{2+}$  involved in MM'CT transitions #3.

**Table S14.** (TD)DFT assignments for calculated UV-Vis transitions of complex **[Ru<sup>II</sup>Ru<sup>II</sup>(py)<sub>4</sub>Ru<sup>II</sup>]** in their singlet ground state.

| No. | Wavelength (nm) | Osc. Strength | Major contributions                                                                                             | Assignment                                              |
|-----|-----------------|---------------|-----------------------------------------------------------------------------------------------------------------|---------------------------------------------------------|
| 6   | 498.3           | 0.0151        | H-3->L+1 (10%)<br>H-1->L+2 (22%)<br>HOMO->L+1 (18%)<br>HOMO->L+3 (24%)                                          | d(Ru <sub>bda</sub> ,Ru <sub>py</sub> )-> $\pi^*$ (bda) |
| 8   | 489.7           | 0.0193        | H-3->L+1 (27%)<br>H-1->L+2 (10%)<br>HOMO->L+1 (14%)<br>HOMO->L+3 (16%)                                          | d(Ru <sub>bda</sub> ,Ru <sub>py</sub> )-> $\pi^*$ (bda) |
| 16  | 442.0           | 0.0316        | H-5->L+2 (13%)<br>H-2->L+2 (23%)<br>H-2->L+3 (17%)                                                              | d(Ru <sub>bda</sub> ,Ru <sub>py</sub> )-> $\pi^*$ (bda) |
| 36  | 389.1           | 0.0292        | H-2->L+5 (46%)<br>H-1->L+5 (16%)                                                                                | d(Ru <sub>bda</sub> ,Ru <sub>py</sub> )-> $\pi^*$ (bda) |
| 60  | 360.2           | 0.1275        | H-4->L+4 (10%)<br>H-4->L+7 (13%)<br>H-4->L+8 (41%)<br>HOMO->L+9 (11%)                                           | d(Ru <sub>py</sub> ,Ru <sub>bda</sub> )-> $\pi^*$ (py)  |
| 61  | 357.3           | 0.0839        | H-4->L+5 (10%)<br>H-4->L+7 (28%)<br>H-4->L+8 (10%)<br>H-1->L+6 (22%)                                            | d(Ru <sub>py</sub> ,Ru <sub>bda</sub> )-> $\pi^*$ (py)  |
| 69  | 346.3           | 0.0474        | H-5->L+4 (20%)<br>H-5->L+5 (29%)                                                                                | d(Ru <sub>bda</sub> ,Ru <sub>py</sub> )-> $\pi^*$ (bda) |
| 71  | 342.3           | 0.0119        | H-6->L+5 (39%)<br>H-3->L+4 (10%)                                                                                | d(Ru <sub>bda</sub> ,Ru <sub>py</sub> )-> $\pi^*$ (bda) |
| 105 | 310.7           | 0.0376        | H-2->L+11 (17%)<br>H-2->L+12 (10%)<br>H-2->L+13 (12%)<br>H-1->L+11 (12%)                                        | d(Ru <sub>py</sub> ,Ru <sub>bda</sub> )-> $\pi^*$ (py)  |
| 147 | 286.6           | 0.2903        | H-18->LUMO (13%)<br>H-18->L+1 (11%)<br>H-17->LUMO (11%)<br>H-17->L+1 (12%)<br>H-10->L+4 (13%)<br>H-9->L+5 (20%) | $\pi$ (bda)> $\pi^*$ (bda)                              |
| 148 | 285.2           | 0.0875        | H-17->L+1 (12%)<br>H-10->L+5 (14%)<br>H-9->L+4 (26%)<br>H-9->L+5 (25%)                                          | $\pi$ (bda)> $\pi^*$ (bda)                              |
| 266 | 247.0           | 0.1809        | H-2->L+18 (22%)<br>H-2->L+20 (10%)                                                                              | d(Ru <sub>py</sub> ,Ru <sub>bda</sub> )-> $\pi^*$ (bda) |

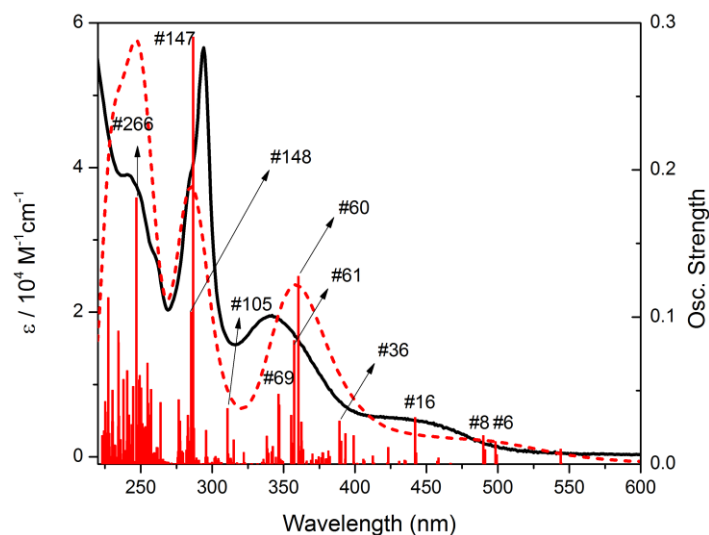

**Fig. S34** (TD)DFT-calculated (dashed curve) and experimental (solid curve) UV-visible absorption spectra of complex  $[\text{Ru}^{\text{III}}\text{Ru}^{\text{II}}(\text{py})_4\text{Ru}^{\text{II}}]$  in their singlet ground state. Calculated transition are represented by red vertical bars.

**Table S15.** (TD)DFT assignments for calculated UV-Vis transitions of the complex  $[\text{Ru}^{\text{III}}\text{Ru}^{\text{II}}(\text{py})_4\text{Ru}^{\text{III}}]^{2+}$  in their triplet ground state.

| No. | Wavelength (nm) | Osc. Strength | Major contributions                                                                                                                                                                              | Assignment                                                                           |
|-----|-----------------|---------------|--------------------------------------------------------------------------------------------------------------------------------------------------------------------------------------------------|--------------------------------------------------------------------------------------|
| 9   | 604.0           | 0.0009        | H-8 $\beta$ $\rightarrow$ LUMO $\beta$ (15%)<br>H-1 $\beta$ $\rightarrow$ LUMO $\beta$ (61%)                                                                                                     | $d(\text{Ru}_{\text{py}}) \rightarrow d(\text{Ru}_{\text{bda}})$                     |
| 10  | 603.8           | 0.0003        | H-8 $\beta$ $\rightarrow$ L+1 $\beta$ (13%)<br>H-1 $\beta$ $\rightarrow$ L+1 $\beta$ (54%)                                                                                                       | $d(\text{Ru}_{\text{py}}) \rightarrow d(\text{Ru}_{\text{bda}})$                     |
| 11  | 582.2           | 0.0056        | H-4 $\alpha$ $\rightarrow$ L+4 $\alpha$ (13%)<br>H-4 $\alpha$ $\rightarrow$ L+6 $\alpha$ (62%)<br>H-3 $\alpha$ $\rightarrow$ L+6 $\alpha$ (11%)                                                  | $d(\text{Ru}_{\text{bda}}) \rightarrow d(\text{Ru}_{\text{bda}})$                    |
| 12  | 579.5           | 0.0059        | H-4 $\alpha$ $\rightarrow$ L+7 $\alpha$ (12%)<br>H-3 $\alpha$ $\rightarrow$ L+5 $\alpha$ (10%)<br>H-3 $\alpha$ $\rightarrow$ L+7 $\alpha$ (65%)                                                  | $d(\text{Ru}_{\text{bda}}) \rightarrow d(\text{Ru}_{\text{bda}})$                    |
| 28  | 504.6           | 0.005         | H-1 $\alpha$ $\rightarrow$ L+1 $\alpha$ (36%)<br>H-1 $\beta$ $\rightarrow$ L+3 $\beta$ (33%)                                                                                                     | $d(\text{Ru}_{\text{py}}) \rightarrow \pi^*(\text{bda})$                             |
| 99  | 375.8           | 0.0159        | H-6 $\alpha$ $\rightarrow$ LUMO $\alpha$ (14%)<br>H-6 $\beta$ $\rightarrow$ L+2 $\beta$ (31%)<br>H-5 $\beta$ $\rightarrow$ L+2 $\beta$ (13%)                                                     | LLCT (DMSO $\rightarrow$ bda)                                                        |
| 123 | 357.6           | 0.0468        | HOMO $\alpha$ $\rightarrow$ L+10 $\alpha$ (35%)<br>HOMO $\beta$ $\rightarrow$ L+12 $\beta$ (39%)                                                                                                 | $d(\text{Ru}_{\text{py}}) \rightarrow \pi^*(\text{py})$                              |
| 124 | 356.5           | 0.0444        | HOMO $\alpha$ $\rightarrow$ L+11 $\alpha$ (36%)<br>HOMO $\beta$ $\rightarrow$ L+13 $\beta$ (39%)                                                                                                 | $d(\text{Ru}_{\text{py}}) \rightarrow \pi^*(\text{py})$                              |
| 180 | 334.2           | 0.1576        | H-1 $\alpha$ $\rightarrow$ L+12 $\alpha$ (15%)<br>H-1 $\alpha$ $\rightarrow$ L+13 $\alpha$ (14%)<br>H-1 $\beta$ $\rightarrow$ L+14 $\beta$ (12%)<br>H-1 $\beta$ $\rightarrow$ L+15 $\beta$ (14%) | $d(\text{Ru}_{\text{py}}) \rightarrow \pi^*(\text{py})$                              |
| 182 | 333.0           | 0.1204        | H-2 $\alpha$ $\rightarrow$ L+13 $\alpha$ (19%)<br>H-2 $\beta$ $\rightarrow$ L+15 $\beta$ (18%)                                                                                                   | $d(\text{Ru}_{\text{py}}) \rightarrow \pi^*(\text{py})$                              |
| 309 | 287.7           | 0.107         | H-1 $\beta$ $\rightarrow$ L+19 $\beta$ (12%)                                                                                                                                                     | $d(\text{Ru}_{\text{py}}) \rightarrow \pi^*(\text{py})$                              |
| 380 | 273.3           | 0.1078        | H-6 $\beta$ $\rightarrow$ L+10 $\beta$ (23%)<br>H-5 $\beta$ $\rightarrow$ L+11 $\beta$ (14%)                                                                                                     | LMCT (DMSO $\rightarrow$ $\text{Ru}_{\text{bda}}$ )<br>LLCT (DMSO $\rightarrow$ bda) |



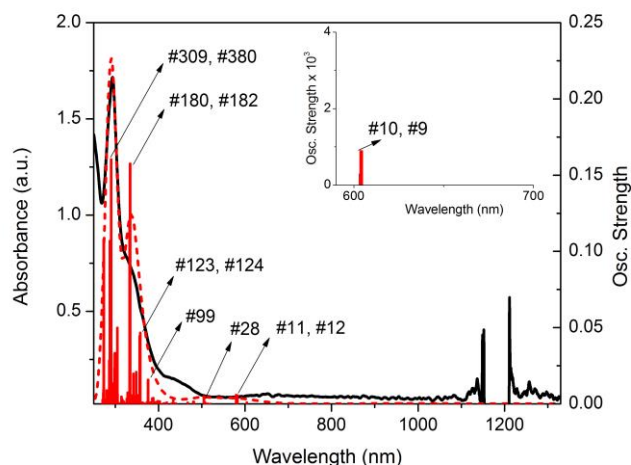

**Fig. S35** (TD)DFT-calculated (dashed curve) and experimental (solid curve) UV-visible absorption spectra of complex  $[\text{Ru}^{\text{III}}\text{Ru}^{\text{II}}(\text{py})_4\text{Ru}^{\text{III}}]^{2+}$  in their triplet ground state. Calculated transition are represented by red vertical bars.

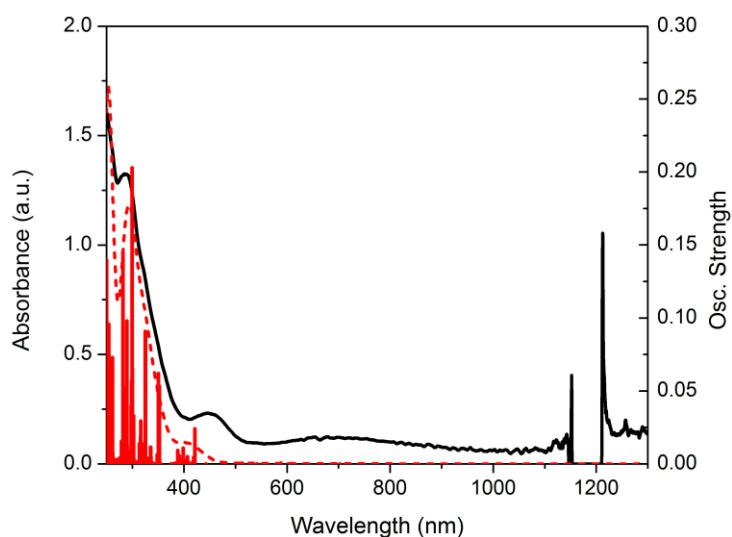

**Fig. S36** Left: (TD)DFT-calculated (dashed curve) and experimental (solid curve) UV-visible absorption spectra of complex  $[\text{Ru}^{\text{IV}}\text{Ru}^{\text{II}}(\text{py})_4\text{Ru}^{\text{IV}}]^{2+}$  in their singlet ground state. Calculated transition are represented by red vertical bars.

**Table S16.** (TD)DFT assignments for calculated UV-Vis transitions of the complex  $[\text{Ru}^{\text{V}}\text{Ru}^{\text{II}}(\text{py})_4\text{Ru}^{\text{IV}}]^{2+}$  in their doublet ground state.

| No. | Wavelength (nm) | Osc. Strength | Major contributions                                                                                         | Assignment                                     |
|-----|-----------------|---------------|-------------------------------------------------------------------------------------------------------------|------------------------------------------------|
| 3   | 1092.7          | 0.0275        | H-2 $\beta$ ->LUMO $\beta$ (88%)<br>H-1 $\beta$ ->LUMO $\beta$ (10%)                                        | d(Ru <sub>py</sub> ) -> d(Ru <sub>bdaO</sub> ) |
| 25  | 616.1           | 0.0078        | H-4 $\beta$ ->LUMO $\beta$ (91%)                                                                            | $\pi$ (bdaO) -> d(Ru <sub>bdaO</sub> )         |
| 125 | 397.2           | 0.0482        | H-4 $\alpha$ ->L+2 $\alpha$ (21%)<br>H-4 $\beta$ ->L+3 $\beta$ (48%)                                        | $\pi$ (bdaO) -> d(Ru <sub>bdaO</sub> )         |
| 210 | 348.4           | 0.0561        | HOMO $\alpha$ ->L+12 $\alpha$ (41%)<br>HOMO $\beta$ ->L+13 $\beta$ (43%)                                    | d(Ru <sub>py</sub> ) -> $\pi^*$ (py)           |
| 211 | 347.0           | 0.0623        | HOMO $\alpha$ ->L+13 $\alpha$ (45%)<br>HOMO $\beta$ ->L+14 $\beta$ (46%)                                    | d(Ru <sub>py</sub> ) -> $\pi^*$ (py)           |
| 307 | 320.5           | 0.0477        | H-1 $\alpha$ ->L+15 $\alpha$ (10%)<br>H-4 $\beta$ ->L+5 $\beta$ (11%)                                       | d(Ru <sub>py</sub> ) -> $\pi^*$ (py)           |
| 308 | 320.2           | 0.0971        | H-2 $\alpha$ ->L+14 $\alpha$ (18%)<br>H-29 $\beta$ ->LUMO $\beta$ (20%)<br>H-2 $\beta$ ->L+15 $\beta$ (13%) | d(Ru <sub>py</sub> ) -> $\pi^*$ (py)           |

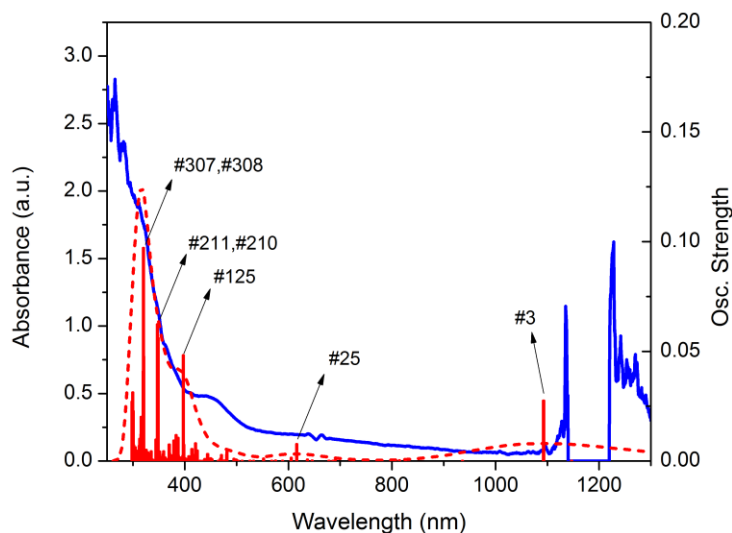

**Fig. S37** Left: (TD)DFT-calculated (dashed curve) and experimental (solid curve) UV-visible absorption spectra of complex  $[\text{Ru}^{\text{V}}\text{Ru}^{\text{II}}(\text{py})_4\text{Ru}^{\text{IV}}]^{2+}$  in their triplet ground state. Calculated transition are represented by red vertical bars.
